# Supplementary material
Source: PubMed Central journal article supplement (PMC5892114)
Supplement: JB.00031-18_zjb999094720s1.pdf [file JB.00031-18_zjb999094720s1.pdf]

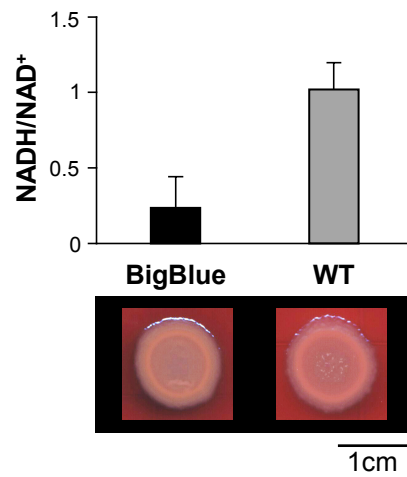

**FIG S1.** NADH/NAD<sup>+</sup> ratio of WT and BigBlue colonies sampled after 36 hours of growth in the colony morphology assay. Error bars represent the standard deviation of biological triplicates.

**Table S1.** KEGG pathway analysis of cluster 1 and cluster 2 proteins in Figure 1A.

| <b>Cluster 1</b>  |             |                                                    |                                                                                                                                                      |                                                          |
|-------------------|-------------|----------------------------------------------------|------------------------------------------------------------------------------------------------------------------------------------------------------|----------------------------------------------------------|
| <b>Locus Tag</b>  | <b>Gene</b> | <b>Product</b>                                     | <b>KEGG Pathway Name</b>                                                                                                                             | <b>Xref</b>                                              |
| <b>Metabolism</b> |             |                                                    |                                                                                                                                                      |                                                          |
| PA14_01600        |             | putative aldehyde dehydrogenase                    | Valine, leucine and isoleucine degradation; beta-Alanine metabolism; Inositol phosphate metabolism; Propanoate metabolism; Carbon metabolism         | pau00280<br>pau00410<br>pau00562<br>pau00640<br>pau01200 |
| PA14_01620        | aptA        | beta alanine--pyruvate transaminase                | Valine, leucine and isoleucine degradation; beta-Alanine metabolism; Propanoate metabolism                                                           | pau00280<br>pau00410<br>pau00640                         |
| PA14_03330        |             | hypothetical protein                               | Histidine metabolism; Biosynthesis of secondary metabolites; Biosynthesis of amino acids                                                             | pau00340<br>pau01110<br>pau01230                         |
| PA14_03450        | gabT        |                                                    | Alanine, aspartate and glutamate metabolism                                                                                                          | pau00250                                                 |
| PA14_03450        | gabT        |                                                    | Alanine, aspartate and glutamate metabolism; Lysine degradation; Butanoate metabolism                                                                | pau00250                                                 |
| PA14_04760        | coaD        |                                                    | Pantothenate and CoA biosynthesis                                                                                                                    | pau00770                                                 |
| PA14_09470        | phzB1       | phenazine biosynthesis                             |                                                                                                                                                      |                                                          |
| PA14_10040        |             | amidase                                            | Arginine and proline metabolism; Phenylalanine metabolism; Tryptophan metabolism; Aminobenzoate degradation; Styrene degradation                     | pau00330<br>pau00360<br>pau00380<br>pau00627<br>pau00643 |
| PA14_11000        | hpaA        | 4-hydroxyphenylacetate 3-monooxygenase large chain | Tyrosine metabolism; Degradation of aromatic compounds                                                                                               | pau00350                                                 |
| PA14_13330        |             | hypothetical protein                               | Aminobenzoate degradation; Folate biosynthesis; Two-component system                                                                                 | pau00627                                                 |
| PA14_14700        | cysE        | serine O-acetyltransferase                         | Cysteine and methionine metabolism; Sulfur metabolism; Biosynthesis of amino acids                                                                   | pau00270                                                 |
| PA14_17190        | fabZ        | (3R)-hydroxymyristoyl-ACP dehydratase              | Fatty acid biosynthesis; Fatty acid metabolism; Biotin metabolism                                                                                    | pau00061<br>pau01212<br>pau00780                         |
| PA14_18890        |             | electron transport complex RxsE subunit            |                                                                                                                                                      |                                                          |
| PA14_20890        | rfaD        |                                                    | Lipopolysaccharide biosynthesis                                                                                                                      | pau00540                                                 |
| PA14_23280        | pheA        | chorismate mutase                                  | Phenylalanine, tyrosine and tryptophan biosynthesis; Biosynthesis of secondary metabolites; Biosynthesis of antibiotics; Biosynthesis of amino acids | pau00400<br>pau01100<br>pau01110<br>pau01130<br>pau01230 |
| PA14_24640        | pyrD        |                                                    | Pyrimidine metabolism                                                                                                                                | pau00240                                                 |
| PA14_25210        |             | 5'-methylthioadenosine phosphorylase               | Cysteine and methionine metabolism                                                                                                                   | pau00270                                                 |

**Table S1** - cluster 1 (continued)

|            |      |                                                                                   |                                                                                                                                                                                                                            |                                                                      |
|------------|------|-----------------------------------------------------------------------------------|----------------------------------------------------------------------------------------------------------------------------------------------------------------------------------------------------------------------------|----------------------------------------------------------------------|
| PA14_25250 |      |                                                                                   | Glycolysis / Gluconeogenesis; Biosynthesis of secondary metabolites; Biosynthesis of antibiotics; Biosynthesis of amino acids                                                                                              | pau00010<br>pau01110<br>pau01130<br>pau01230                         |
| PA14_27500 |      | aminotransferase AlaT                                                             | Alanine, aspartate and glutamate metabolism; Valine, leucine and isoleucine biosynthesis; Biosynthesis of secondary metabolites; Biosynthesis of antibiotics; 2-Oxocarboxylic acid metabolism; Biosynthesis of amino acids | pau00250<br>pau00290<br>pau01110<br>pau01130<br>pau01210<br>pau01230 |
| PA14_28650 | thrS | threonyl-tRNA synthetase                                                          | Aminoacyl-tRNA biosynthesis                                                                                                                                                                                                | pau00970                                                             |
| PA14_42730 |      | putative oxidase                                                                  | Cysteine and methionine metabolism                                                                                                                                                                                         | pau00270                                                             |
| PA14_43680 | fabA | 3-hydroxydecanoyl-(acyl carrier protein) dehydratase                              | Fatty acid biosynthesis; Fatty acid metabolism                                                                                                                                                                             | pau00061                                                             |
| PA14_43950 | sucC | succinyl-CoA synthetase subunit beta                                              | TCA cycle; Propanoate metabolism; C5-Branched dibasic acid metabolism; Biosynthesis of secondary metabolites; Biosynthesis of antibiotics                                                                                  | pau00020<br>pau00640<br>pau00660<br>pau01110<br>pau01130             |
| PA14_44070 | gltA |                                                                                   | Citrate cycle (TCA cycle)                                                                                                                                                                                                  | pau00020                                                             |
| PA14_44070 | gltA |                                                                                   | Glyoxylate and dicarboxylate metabolism; Biosynthesis of secondary metabolites; Biosynthesis of antibiotics; 2-Oxocarboxylic acid metabolism; Biosynthesis of amino acids                                                  | pau00630<br>pau01110<br>pau01130<br>pau01210<br>pau01230             |
| PA14_44350 |      | putative cytochrome c oxidase subunit                                             | Oxidative phosphorylation                                                                                                                                                                                                  | pau00190                                                             |
| PA14_47210 | cyoA | cytochrome o ubiquinol oxidase subunit II                                         | Oxidative phosphorylation                                                                                                                                                                                                  | pau00190                                                             |
| PA14_52040 | purM | phosphoribosylaminoimidazole synthetase                                           | Purine metabolism; Biosynthesis of secondary metabolites, antibiotics                                                                                                                                                      | pau0023;<br>pau01110<br>pau01130                                     |
| PA14_52800 | acsA |                                                                                   | Glycolysis / Gluconeogenesis; Pyruvate, Propanoate, Methane metabolism; Biosynthesis of secondary metabolites, antibiotics                                                                                                 | pau00010<br>pau00620<br>pau00640<br>pau00680<br>pau01110<br>pau01130 |
| PA14_52850 |      | acyl-CoA lyase beta chain                                                         | C5-Branched dibasic acid metabolism                                                                                                                                                                                        | pau00660                                                             |
| PA14_52990 | phhA |                                                                                   | Phenylalanine metabolism; Phenylalanine, tyrosine and tryptophan biosynthesis                                                                                                                                              | pau00360<br>pau00400                                                 |
| PA14_57710 | cysN | bifunctional sulfate adenylyltransferase subunit 1/adenylylsulfate kinase protein | Purine metabolism; Selenocompound metabolism; Sulfur metabolism                                                                                                                                                            | pau00230<br>pau00450<br>pau00920                                     |
| PA14_65710 | aspP | adenosine diphosphate sugar pyrophosphatase                                       | Purine metabolism                                                                                                                                                                                                          | pau00230                                                             |
| PA14_66900 | ubiE | ubiquinone/menaquinone biosynthesis methyltransferase                             | Ubiquinone and other terpenoid-quinone biosynthesis; Biosynthesis of secondary metabolites                                                                                                                                 | pau00130<br>pau01110                                                 |
| PA14_70040 | dadA | D-amino acid dehydrogenase small subunit                                          | Phenylalanine metabolism                                                                                                                                                                                                   | pau00360                                                             |

**Table S1** - cluster 1 (continued)

|                                  |       |                                            |                                                                                                                                                                                                                                                                                                                                                          |                                                                                                                                                                                  |
|----------------------------------|-------|--------------------------------------------|----------------------------------------------------------------------------------------------------------------------------------------------------------------------------------------------------------------------------------------------------------------------------------------------------------------------------------------------------------|----------------------------------------------------------------------------------------------------------------------------------------------------------------------------------|
| PA14_71650                       | aspA  |                                            | Alanine, aspartate and glutamate metabolism                                                                                                                                                                                                                                                                                                              | pau00250                                                                                                                                                                         |
| PA14_71720                       |       | pyruvate carboxylase subunit B             | TCA cycle; Pyruvate metabolism; Biosynthesis of amino acids                                                                                                                                                                                                                                                                                              | pau00020                                                                                                                                                                         |
| PA14_73300                       | atpE  | F0F1 ATP synthase subunit C                | Oxidative phosphorylation                                                                                                                                                                                                                                                                                                                                | pau00190                                                                                                                                                                         |
| PA14_13090                       |       |                                            | Fatty acid degradation; Synthesis and degradation of ketone bodies; Valine, leucine and isoleucine, Lysine, Benzoate degradation; Tryptophan, Pyruvate, Glyoxylate and dicarboxylate, Propanoate, Butanoate metabolism; Terpenoid backbone biosynthesis; Biosynthesis of secondary metabolites, antibiotics; Fatty acid metabolism; Two-component system | pau00071<br>pau00072<br>pau00280<br>pau00310<br>pau00362<br>pau00380<br>pau00620<br>pau00630<br>pau00640<br>pau00650<br>pau00900<br>pau01110<br>pau01130<br>pau01212<br>pau02020 |
| PA14_08760                       | rpoB  | DNA-directed RNA polymerase subunit beta   | Purine metabolism; Pyrimidine metabolism; RNA polymerase                                                                                                                                                                                                                                                                                                 | pau00230<br>pau00240<br>pau03020                                                                                                                                                 |
| PA14_69230                       | ppk   | polyphosphate kinase                       | Oxidative phosphorylation; RNA degradation                                                                                                                                                                                                                                                                                                               | pau00190<br>pau03018                                                                                                                                                             |
| <b>Motility</b>                  |       |                                            |                                                                                                                                                                                                                                                                                                                                                          |                                                                                                                                                                                  |
| PA14_58650                       |       |                                            | Two-component system; Bacterial chemotaxis                                                                                                                                                                                                                                                                                                               | pau0202;<br>pau02030                                                                                                                                                             |
| PA14_60280                       | fimU  |                                            |                                                                                                                                                                                                                                                                                                                                                          |                                                                                                                                                                                  |
| PA14_60310                       | pilY1 | type 4 fimbrial biogenesis protein PilY1   |                                                                                                                                                                                                                                                                                                                                                          |                                                                                                                                                                                  |
| PA14_60870                       | morA  | motility regulator                         |                                                                                                                                                                                                                                                                                                                                                          |                                                                                                                                                                                  |
| PA14_66630                       | pilP  | type 4 fimbrial biogenesis protein PilP    |                                                                                                                                                                                                                                                                                                                                                          |                                                                                                                                                                                  |
| <b>Recombination/Replication</b> |       |                                            |                                                                                                                                                                                                                                                                                                                                                          |                                                                                                                                                                                  |
| PA14_09200                       | ssb   | single-stranded DNA-binding protein        | DNA replication; Mismatch repair; Homologous recombination                                                                                                                                                                                                                                                                                               | pau03030<br>pau03430<br>pau03440                                                                                                                                                 |
| PA14_09200                       | ssb   | single-stranded DNA-binding protein        | Homologous recombination                                                                                                                                                                                                                                                                                                                                 | pau03440                                                                                                                                                                         |
| PA14_17500                       | mutS  | DNA mismatch repair protein MutS           | Mismatch repair                                                                                                                                                                                                                                                                                                                                          | pau03430                                                                                                                                                                         |
| PA14_17530                       | recA  | recombinase A                              | Homologous recombination                                                                                                                                                                                                                                                                                                                                 | pau03440                                                                                                                                                                         |
| PA14_54590                       | ung   |                                            | Base excision repair                                                                                                                                                                                                                                                                                                                                     | pau03410                                                                                                                                                                         |
| PA14_00010                       | dnaA  | chromosomal replication initiation protein |                                                                                                                                                                                                                                                                                                                                                          |                                                                                                                                                                                  |
| <b>Signaling</b>                 |       |                                            |                                                                                                                                                                                                                                                                                                                                                          |                                                                                                                                                                                  |
| PA14_06070                       | creC  | sensory histidine kinase CreC              | Two-component system                                                                                                                                                                                                                                                                                                                                     | pau02020                                                                                                                                                                         |

**Table S1** - cluster 1 (continued)

|                                  |      |                                            |                                                                                                                                                                                                                                                                                                                                                          |                                                                                                                                                                                  |
|----------------------------------|------|--------------------------------------------|----------------------------------------------------------------------------------------------------------------------------------------------------------------------------------------------------------------------------------------------------------------------------------------------------------------------------------------------------------|----------------------------------------------------------------------------------------------------------------------------------------------------------------------------------|
| PA14_13090                       |      |                                            | Fatty acid degradation; Synthesis and degradation of ketone bodies; Valine, leucine and isoleucine, Lysine, Benzoate degradation; Tryptophan, Pyruvate, Glyoxylate and dicarboxylate, Propanoate, Butanoate metabolism; Terpenoid backbone biosynthesis; Biosynthesis of secondary metabolites, antibiotics; Fatty acid metabolism; Two-component system | pau00071<br>pau00072<br>pau00280<br>pau00310<br>pau00362<br>pau00380<br>pau00620<br>pau00630<br>pau00640<br>pau00650<br>pau00900<br>pau01110<br>pau01130<br>pau01212<br>pau02020 |
| PA14_30630                       | pqsH | quinolone biosynthesis                     |                                                                                                                                                                                                                                                                                                                                                          |                                                                                                                                                                                  |
| PA14_45500                       |      | putative purine-binding chemotaxis protein | Two-component system                                                                                                                                                                                                                                                                                                                                     | pau02020                                                                                                                                                                         |
| PA14_45500                       |      | putative purine-binding chemotaxis protein | Bacterial chemotaxis                                                                                                                                                                                                                                                                                                                                     | pau02030                                                                                                                                                                         |
| PA14_68260                       |      | c4-dicarboxylate-binding protein           | Two-component system                                                                                                                                                                                                                                                                                                                                     | pau02020                                                                                                                                                                         |
| PA14_72390                       |      | putative two-component sensor              | Two-component system                                                                                                                                                                                                                                                                                                                                     | pau02020                                                                                                                                                                         |
| PA14_72720                       |      | putative two-component response regulator  | Two-component system                                                                                                                                                                                                                                                                                                                                     | pau02020                                                                                                                                                                         |
| PA14_58650                       |      |                                            | Two-component system;<br>Bacterial chemotaxis                                                                                                                                                                                                                                                                                                            | pau0202;<br>pau02030                                                                                                                                                             |
| <b>Transcription/Translation</b> |      |                                            |                                                                                                                                                                                                                                                                                                                                                          |                                                                                                                                                                                  |
| PA14_05560                       |      |                                            | RNA degradation                                                                                                                                                                                                                                                                                                                                          | pau03018                                                                                                                                                                         |
| PA14_14040                       | rhl  |                                            | RNA degradation                                                                                                                                                                                                                                                                                                                                          | pau03018                                                                                                                                                                         |
| PA14_27370                       |      |                                            | RNA degradation                                                                                                                                                                                                                                                                                                                                          | pau03018                                                                                                                                                                         |
| PA14_62560                       | pcnB | poly(A) polymerase                         | RNA degradation                                                                                                                                                                                                                                                                                                                                          | pau03018                                                                                                                                                                         |
| PA14_08760                       | rpoB | DNA-directed RNA polymerase subunit beta   | Purine metabolism; Pyrimidine metabolism; RNA polymerase                                                                                                                                                                                                                                                                                                 | pau00230<br>pau00240<br>pau03020                                                                                                                                                 |
| PA14_69230                       | ppk  | polyphosphate kinase                       | Oxidative phosphorylation; RNA degradation                                                                                                                                                                                                                                                                                                               | pau00190<br>pau03018                                                                                                                                                             |
| PA14_08720                       | rplK | 50S ribosomal protein L11                  | Ribosome                                                                                                                                                                                                                                                                                                                                                 | pau03010                                                                                                                                                                         |
| PA14_08740                       | rplJ |                                            | Ribosome                                                                                                                                                                                                                                                                                                                                                 | pau03010                                                                                                                                                                         |
| PA14_08750                       | rplL |                                            | Ribosome                                                                                                                                                                                                                                                                                                                                                 | pau03010                                                                                                                                                                         |
| PA14_08790                       | rpsL |                                            | Ribosome                                                                                                                                                                                                                                                                                                                                                 | pau03010                                                                                                                                                                         |
| PA14_08810                       | rpsG | 30S ribosomal protein S7                   | Ribosome                                                                                                                                                                                                                                                                                                                                                 | pau03010                                                                                                                                                                         |
| PA14_08840                       | rpsJ | 30S ribosomal protein S10                  | Ribosome                                                                                                                                                                                                                                                                                                                                                 | pau03010                                                                                                                                                                         |
| PA14_08850                       | rplC | 50S ribosomal protein L3                   | Ribosome                                                                                                                                                                                                                                                                                                                                                 | pau03010                                                                                                                                                                         |
| PA14_08870                       | rplW | 50S ribosomal protein L23                  | Ribosome                                                                                                                                                                                                                                                                                                                                                 | pau03010                                                                                                                                                                         |
| PA14_08880                       | rplB | 50S ribosomal protein L2                   | Ribosome                                                                                                                                                                                                                                                                                                                                                 | pau03010                                                                                                                                                                         |

**Table S1** - cluster 1 (continued)

|                  |      |                                        |                            |          |
|------------------|------|----------------------------------------|----------------------------|----------|
| PA14_08900       | rplV | 50S ribosomal protein L22              | Ribosome                   | pau03010 |
| PA14_08930       | rpmC | 50S ribosomal protein L29              | Ribosome                   | pau03010 |
| PA14_08950       | rplN | 50S ribosomal protein L14              | Ribosome                   | pau03010 |
| PA14_08970       | rplE | 50S ribosomal protein L5               | Ribosome                   | pau03010 |
| PA14_09000       | rplF | 50S ribosomal protein L6               | Ribosome                   | pau03010 |
| PA14_09040       | rplO | 50S ribosomal protein L15              | Ribosome                   | pau03010 |
| PA14_09080       | rpsM | 30S ribosomal protein S13              | Ribosome                   | pau03010 |
| PA14_09100       | rpsD | 30S ribosomal protein S4               | Ribosome                   | pau03010 |
| PA14_16000       | rplS | 50S ribosomal protein L19              | Ribosome                   | pau03010 |
| PA14_17060       | rpsB |                                        | Ribosome                   | pau03010 |
| PA14_25630       | rpmF | 50S ribosomal protein L32              | Ribosome                   | pau03010 |
| PA14_28660       | infC | translation initiation factor IF-3     |                            |          |
| PA14_28680       | rplT | 50S ribosomal protein L20              | Ribosome                   | pau03010 |
| PA14_57580       | rpsI | 30S ribosomal protein S9               | Ribosome                   | pau03010 |
| PA14_60400       | rpsT |                                        | Ribosome                   | pau03010 |
| PA14_60450       | rpmA | 50S ribosomal protein L27              | Ribosome                   | pau03010 |
| PA14_60460       | rplU | 50S ribosomal protein L21              | Ribosome                   | pau03010 |
| PA14_62720       | rpsO |                                        | Ribosome                   | pau03010 |
| PA14_62760       | infB | translation initiation factor IF-2     |                            |          |
| PA14_70180       | rpmG | 50S ribosomal protein L33              | Ribosome                   | pau03010 |
| PA14_70190       | rpmB | 50S ribosomal protein L28              | Ribosome                   | pau03010 |
| <b>Transport</b> |      |                                        |                            |          |
| PA14_01040       |      | putative secretion protein             |                            |          |
| PA14_03950       | spuG | polyamine transport protein PotH       | ABC transporters           | pau02010 |
| PA14_04910       | ftsE | cell division ATP-binding protein FtsE | ABC transporters           | pau02010 |
| PA14_09050       | secY | preprotein translocase subunit SecY    | Protein export             | pau03060 |
| PA14_11270       | oprG |                                        |                            |          |
| PA14_14630       | secD | preprotein translocase subunit SecD    | Protein export             | pau03060 |
| PA14_15960       | ffh  |                                        | Protein export             | pau03060 |
| PA14_17640       | potA | polyamine transport protein PotA       | ABC transporters           | pau02010 |
| PA14_21450       |      | hypothetical protein                   | Bacterial secretion system | pau03070 |
| PA14_41110       |      | putative solute-binding protein        | ABC transporters           | pau02010 |

**Table S1** - cluster 1 (continued)

|                                  |      |                                                   |                  |          |
|----------------------------------|------|---------------------------------------------------|------------------|----------|
| PA14_46920                       |      | putative permease of ABC transporter              | ABC transporters | pau02010 |
| PA14_46950                       |      | putative ATP-binding component of ABC transporter | ABC transporters | pau02010 |
| PA14_01970                       |      | putative RND efflux transporter                   |                  |          |
| PA14_69340                       |      | putative ATP-binding component of ABC transporter |                  |          |
| <b>Others</b>                    |      |                                                   |                  |          |
| CON__ENSEMBL:ENSBTAP00000001528  |      |                                                   |                  |          |
| CON__ENSEMBL:ENSBTAP000000025008 |      |                                                   |                  |          |
| CON__P01966                      |      |                                                   |                  |          |
| CON__Q1A7A4                      |      |                                                   |                  |          |
| PA14_01540                       |      |                                                   |                  |          |
| PA14_01730                       |      |                                                   |                  |          |
| PA14_01930                       | pcaR |                                                   |                  |          |
| PA14_03320                       |      | hypothetical protein                              |                  |          |
| PA14_03610                       |      |                                                   |                  |          |
| PA14_04300                       |      |                                                   |                  |          |
| PA14_04640                       |      | hypothetical protein                              |                  |          |
| PA14_04790                       |      |                                                   |                  |          |
| PA14_05440                       |      | hypothetical protein                              |                  |          |
| PA14_05660                       |      |                                                   |                  |          |
| PA14_05820                       |      |                                                   |                  |          |
| PA14_06240                       |      |                                                   |                  |          |
| PA14_06340                       |      | putative molybdenum transport regulator           |                  |          |
| PA14_07780                       |      | hypothetical protein                              |                  |          |
| PA14_12280                       | Int  |                                                   |                  |          |
| PA14_12570                       |      |                                                   |                  |          |
| PA14_12670                       |      |                                                   |                  |          |
| PA14_14140                       |      | hypothetical protein                              |                  |          |
| PA14_14690                       |      | putative methyltransferase                        |                  |          |
| PA14_15070                       | oprC | outer membrane copper receptor OprC               |                  |          |
| PA14_16840                       |      |                                                   |                  |          |
| PA14_17170                       |      | hypothetical protein                              |                  |          |
| PA14_18590                       |      |                                                   |                  |          |

**Table S1** - cluster 1 (continued)

|            |       |                                                |  |  |
|------------|-------|------------------------------------------------|--|--|
| PA14_18700 | mnt   | ribonuclease T                                 |  |  |
| PA14_18860 |       | hypothetical protein                           |  |  |
| PA14_18870 |       |                                                |  |  |
| PA14_19730 |       |                                                |  |  |
| PA14_23260 | gyrA  |                                                |  |  |
| PA14_23390 | orfE  | putative polysaccharide biosynthesis protein   |  |  |
| PA14_24500 | pelC  | putative lipoprotein                           |  |  |
| PA14_24910 | moeA2 | molybdenum cofactor biosynthesis protein A2    |  |  |
| PA14_24990 |       | hypothetical protein                           |  |  |
| PA14_25100 |       |                                                |  |  |
| PA14_25140 |       |                                                |  |  |
| PA14_26540 |       | hypothetical protein                           |  |  |
| PA14_27180 |       |                                                |  |  |
| PA14_27990 |       |                                                |  |  |
| PA14_29400 |       | hypothetical protein                           |  |  |
| PA14_29830 |       |                                                |  |  |
| PA14_30160 |       | hypothetical protein                           |  |  |
| PA14_30240 | infA  |                                                |  |  |
| PA14_34230 |       |                                                |  |  |
| PA14_35600 | pslL  |                                                |  |  |
| PA14_35670 | pslG  | putative glycosyl hydrolase                    |  |  |
| PA14_35900 |       |                                                |  |  |
| PA14_36280 |       | putative antibiotic biosynthesis monooxygenase |  |  |
| PA14_37580 |       |                                                |  |  |
| PA14_37650 |       |                                                |  |  |
| PA14_37745 |       | carbamoyl transferase                          |  |  |
| PA14_39130 |       |                                                |  |  |
| PA14_40650 |       |                                                |  |  |
| PA14_40890 |       | short chain dehydrogenase                      |  |  |
| PA14_41930 |       |                                                |  |  |
| PA14_42790 |       |                                                |  |  |
| PA14_42860 |       |                                                |  |  |



**Table S1** - cluster 1 (continued)

|            |       |                                  |  |  |
|------------|-------|----------------------------------|--|--|
| PA14_42990 |       | hypothetical protein             |  |  |
| PA14_45260 |       | hypothetical protein             |  |  |
| PA14_45920 |       | hypothetical protein             |  |  |
| PA14_46260 |       | hypothetical protein             |  |  |
| PA14_47440 |       |                                  |  |  |
| PA14_49410 |       |                                  |  |  |
| PA14_49640 |       |                                  |  |  |
| PA14_49920 |       |                                  |  |  |
| PA14_49930 |       |                                  |  |  |
| PA14_50300 |       |                                  |  |  |
| PA14_50590 |       | HSP90 family protein             |  |  |
| PA14_51100 |       | acyl-CoA dehydrogenase           |  |  |
| PA14_51740 | tolR  | TolR protein                     |  |  |
| PA14_51840 |       |                                  |  |  |
| PA14_52140 |       |                                  |  |  |
| PA14_52460 | mgtE  |                                  |  |  |
| PA14_53120 |       | hypothetical protein             |  |  |
| PA14_53400 |       | oxidoreductase                   |  |  |
| PA14_53510 |       |                                  |  |  |
| PA14_56870 |       | hypothetical protein             |  |  |
| PA14_57020 | groES | co-chaperonin GroES              |  |  |
| PA14_57275 | ftsZ  | cell division protein FtsZ       |  |  |
| PA14_57760 | algW  |                                  |  |  |
| PA14_57920 |       | hypothetical protein             |  |  |
| PA14_58580 |       | putative hydroxylase             |  |  |
| PA14_59200 |       | hypothetical protein             |  |  |
| PA14_59220 |       |                                  |  |  |
| PA14_60120 | dcd2  | putative deoxycytidine deaminase |  |  |
| PA14_60445 | obgE  | GTPase ObgE                      |  |  |
| PA14_61050 | mscL  |                                  |  |  |
| PA14_61360 |       |                                  |  |  |
| PA14_61990 |       | hypothetical protein             |  |  |

**Table S1** - cluster 1 (continued)

|            |      |                                                    |  |  |
|------------|------|----------------------------------------------------|--|--|
| PA14_62260 |      |                                                    |  |  |
| PA14_65010 |      |                                                    |  |  |
| PA14_65270 | hflC | protease subunit HflC                              |  |  |
| PA14_66120 |      |                                                    |  |  |
| PA14_66270 | glnE | glutamate-ammonia-ligase<br>adenyltransferase      |  |  |
| PA14_66760 |      | hypothetical protein                               |  |  |
| PA14_66790 | hslU | ATP-dependent protease ATP-binding subunit<br>HslU |  |  |
| PA14_67090 | mdoG | glucan biosynthesis protein G                      |  |  |
| PA14_67940 |      |                                                    |  |  |
| PA14_68660 | rimK |                                                    |  |  |
| PA14_69110 |      |                                                    |  |  |
| PA14_69820 |      | hypothetical protein                               |  |  |
| PA14_70400 |      | hypothetical protein                               |  |  |
| PA14_71430 |      |                                                    |  |  |

Table S1 - (continued)

## Cluster 2

| Locus Tag         | Gene | Product                                                                                | KEGG Pathway Name                                                                                                                                          | Xref                                                     |
|-------------------|------|----------------------------------------------------------------------------------------|------------------------------------------------------------------------------------------------------------------------------------------------------------|----------------------------------------------------------|
| <b>Metabolism</b> |      |                                                                                        |                                                                                                                                                            |                                                          |
| PA14_00120        |      |                                                                                        | Lipopolysaccharide biosynthesis                                                                                                                            | pau00540                                                 |
| PA14_00280        | hemF | coproporphyrinogen III oxidase                                                         | Porphyrin and chlorophyll metabolism;<br>Biosynthesis of secondary metabolites                                                                             | pau00860<br>pau01110                                     |
| PA14_01240        |      |                                                                                        | Nitrogen metabolism                                                                                                                                        | pau00910                                                 |
| PA14_01760        | nuh  |                                                                                        | Purine metabolism; Nicotinate and<br>nicotinamide metabolism                                                                                               | pau00230<br>pau00760                                     |
| PA14_02590        | mdcE | malonate decarboxylase gamma<br>subunit                                                |                                                                                                                                                            |                                                          |
| PA14_03900        | spuC | putative aminotransferase                                                              | Arginine and proline metabolism                                                                                                                            | pau00330                                                 |
| PA14_04410        | ptsP | phosphoenolpyruvate-protein<br>phosphotransferase PtsP                                 | Phosphotransferase system (PTS)                                                                                                                            | pau02060                                                 |
| PA14_05220        |      | cystathionine beta-synthase                                                            | Glycine, serine and threonine metabolism;<br>Cysteine and methionine metabolism;<br>Biosynthesis of antibiotics, amino acids                               | pau00260<br>pau00270<br>pau01130<br>pau01230             |
| PA14_05230        |      | cystathionine gamma-lyase                                                              | Glycine, serine and threonine metabolism;<br>Cysteine and methionine metabolism;<br>Selenocompound metabolism; Biosynthesis<br>of antibiotics, amino acids | pau00260<br>pau00270<br>pau00450<br>pau01130<br>pau01230 |
| PA14_05270        | pyrR | bifunctional pyrimidine regulatory<br>protein PyrR uracil<br>phosphoribosyltransferase | Pyrimidine metabolism                                                                                                                                      | pau00240                                                 |
| PA14_06720        | nirF | heme d1 biosynthesis protein NirF                                                      |                                                                                                                                                            |                                                          |
| PA14_06750        | nirS | nitrite reductase precursor                                                            | Nitrogen metabolism                                                                                                                                        | pau00910                                                 |
| PA14_06770        | nirQ | regulatory protein NirQ                                                                |                                                                                                                                                            |                                                          |
| PA14_06810        | norC | nitric-oxide reductase subunit C                                                       | Nitrogen metabolism                                                                                                                                        | pau00910                                                 |
| PA14_06830        | norB | nitric-oxide reductase subunit B                                                       | Nitrogen metabolism                                                                                                                                        | pau00910                                                 |
| PA14_07170        | epd  | D-erythrose 4-phosphate<br>dehydrogenase                                               | Vitamin B6 metabolism                                                                                                                                      | pau00750                                                 |
| PA14_08460        |      | hypothetical protein                                                                   | Nitrogen metabolism                                                                                                                                        | pau00910                                                 |
| PA14_09160        | bfrA |                                                                                        | Porphyrin and chlorophyll metabolism                                                                                                                       | pau00860                                                 |
| PA14_09210        | pchA | salicylate biosynthesis<br>isochorismate synthase                                      | Ubiquinone and other terpenoid-quinone<br>biosynthesis; Biosynthesis of siderophore<br>group nonribosomal peptides, secondary<br>metabolites, antibiotics  | pau00130<br>pau01053<br>pau01110<br>pau01130             |
| PA14_09220        | pchB | isochorismate-pyruvate lyase                                                           | Biosynthesis of siderophore group<br>nonribosomal peptides, secondary<br>metabolites, antibiotics                                                          | pau01053<br>pau01110<br>pau01130                         |
| PA14_09230        | pchC | pyochelin biosynthetic protein PchC                                                    |                                                                                                                                                            |                                                          |
| PA14_09280        | pchF | pyochelin synthetase                                                                   | Biosynthesis of siderophore group<br>nonribosomal peptides                                                                                                 | pau01053                                                 |
| PA14_09400        | phzS | phenazine biosynthesis                                                                 |                                                                                                                                                            |                                                          |
| PA14_11760        |      | ethanolamine ammonia-lyase small<br>subunit                                            | Glycerophospholipid metabolism                                                                                                                             | pau00564                                                 |

**Table S1** - cluster 2 (continued)

|            |      |                                                            |                                                                                                                                                                                                                                                                            |                                                                                                                                                                      |
|------------|------|------------------------------------------------------------|----------------------------------------------------------------------------------------------------------------------------------------------------------------------------------------------------------------------------------------------------------------------------|----------------------------------------------------------------------------------------------------------------------------------------------------------------------|
| PA14_11770 | eutB | ethanolamine ammonia-lyase large subunit                   | Glycerophospholipid metabolism                                                                                                                                                                                                                                             | pau00564                                                                                                                                                             |
| PA14_12490 |      | AMP nucleosidase                                           | Purine metabolism                                                                                                                                                                                                                                                          | pau00230                                                                                                                                                             |
| PA14_13230 | moaC | molybdenum cofactor biosynthesis protein C                 | Folate biosynthesis; Sulfur relay system                                                                                                                                                                                                                                   | pau00790<br>pau04122                                                                                                                                                 |
| PA14_14470 | pepA | leucyl aminopeptidase                                      | Glutathione metabolism                                                                                                                                                                                                                                                     | pau00480                                                                                                                                                             |
| PA14_16090 | thrC | threonine synthase                                         | Glycine, serine and threonine metabolism; Vitamin B6 metabolism; Biosynthesis of amino acids                                                                                                                                                                               | pau00260<br>pau00750<br>pau01230                                                                                                                                     |
| PA14_16390 |      |                                                            | Glycine, serine and threonine metabolism                                                                                                                                                                                                                                   | pau00260                                                                                                                                                             |
| PA14_18120 | mmsA | methylmalonate-semialdehyde dehydrogenase                  | Valine, leucine and isoleucine degradation; beta-Alanine, Inositol phosphate, Propanoate metabolism                                                                                                                                                                        | pau00280<br>pau00410<br>pau00562<br>pau00640                                                                                                                         |
| PA14_18140 | mmsB | 3-hydroxyisobutyrate dehydrogenase                         | Valine, leucine and isoleucine degradation                                                                                                                                                                                                                                 | pau00280                                                                                                                                                             |
| PA14_18710 | pyrC | dihydroorotase                                             | Pyrimidine metabolism                                                                                                                                                                                                                                                      | pau00240                                                                                                                                                             |
| PA14_19470 | mqaA |                                                            | TCA cycle; Pyruvate metabolism; Biosynthesis of secondary metabolites, antibiotics                                                                                                                                                                                         | pau00020<br>pau00620<br>pau01110<br>pau01130                                                                                                                         |
| PA14_20200 | nosZ | nitrous-oxide reductase                                    | Nitrogen metabolism                                                                                                                                                                                                                                                        | pau00910                                                                                                                                                             |
| PA14_20560 | amiE | acylamide amidohydrolase                                   | Arginine and proline, Phenylalanine, Tryptophan metabolism; Aminobenzoate, Styrene degradation                                                                                                                                                                             | pau00330<br>pau00360<br>pau00380<br>pau00627<br>pau00643                                                                                                             |
| PA14_22910 | edd  |                                                            | Pentose phosphate pathway                                                                                                                                                                                                                                                  | pau00030                                                                                                                                                             |
| PA14_23250 | mtnA |                                                            | Cysteine and methionine metabolism                                                                                                                                                                                                                                         | pau00270                                                                                                                                                             |
| PA14_23880 | folC | folylpolyglutamate synthetase                              | Folate biosynthesis                                                                                                                                                                                                                                                        | pau00790                                                                                                                                                             |
| PA14_24270 | pepN | aminopeptidase N                                           | Glutathione metabolism                                                                                                                                                                                                                                                     | pau00480                                                                                                                                                             |
| PA14_25080 | fadB | multifunctional fatty acid oxidation complex subunit alpha | Fatty acid, Valine, leucine and isoleucine; Geraniol; Lysine, Limonene and pinene, Caprolactam degradation; Tryptophan, beta-Alanine, Propanoate, Butanoate metabolism; Biosynthesis of unsaturated fatty acids, secondary metabolites, antibiotics; Fatty acid metabolism | pau00071<br>pau00280<br>pau00281<br>pau00310<br>pau00903<br>pau00930<br>pau00380<br>pau00410<br>pau00640<br>pau00650<br>pau01040<br>pau01110<br>pau01130<br>pau01212 |
| PA14_25320 | nqrC | Na(+)-translocating NADH-quinone reductase subunit C       |                                                                                                                                                                                                                                                                            |                                                                                                                                                                      |
| PA14_27730 | fadE | acyl-CoA dehydrogenase                                     | Fatty acid degradation                                                                                                                                                                                                                                                     | pau00071                                                                                                                                                             |
| PA14_27730 | fadE | acyl-CoA dehydrogenase                                     | Fatty acid metabolism                                                                                                                                                                                                                                                      | pau01212                                                                                                                                                             |
| PA14_28710 | pheT | phenylalanyl-tRNA synthetase subunit beta                  | Aminoacyl-tRNA biosynthesis                                                                                                                                                                                                                                                | pau00970                                                                                                                                                             |
| PA14_30330 | serS | seryl-tRNA synthetase                                      | Aminoacyl-tRNA biosynthesis                                                                                                                                                                                                                                                | pau00970                                                                                                                                                             |

**Table S1** - cluster 2 (continued)

|            |      |                                                     |                                                                                                                                                                                                                                                                                                                |                                                                                                                                                                                              |
|------------|------|-----------------------------------------------------|----------------------------------------------------------------------------------------------------------------------------------------------------------------------------------------------------------------------------------------------------------------------------------------------------------------|----------------------------------------------------------------------------------------------------------------------------------------------------------------------------------------------|
| PA14_30340 | cysG | siroheme synthase                                   | Porphyrin and chlorophyll metabolism;<br>Biosynthesis of secondary metabolites                                                                                                                                                                                                                                 | pau00860<br>pau01110                                                                                                                                                                         |
| PA14_31820 |      |                                                     | Histidine, Tyrosine, Phenylalanine<br>metabolism; Phenylalanine, tyrosine and<br>tryptophan, Novobiocin biosynthesis<br>Biosynthesis of secondary metabolites,<br>antibiotics, amino acids                                                                                                                     | pau00340<br>pau00350<br>pau00360<br>pau00400<br>pau00401<br>pau01110<br>pau01130<br>pau01230                                                                                                 |
| PA14_33500 | pvdH | diaminobutyrate--2-oxoglutarate<br>aminotransferase |                                                                                                                                                                                                                                                                                                                |                                                                                                                                                                                              |
| PA14_33630 | pvdJ | PvdJ                                                |                                                                                                                                                                                                                                                                                                                |                                                                                                                                                                                              |
| PA14_33650 | pvdD | pyoverdine synthetase D                             |                                                                                                                                                                                                                                                                                                                |                                                                                                                                                                                              |
| PA14_33710 | pvdO | PvdO                                                |                                                                                                                                                                                                                                                                                                                |                                                                                                                                                                                              |
| PA14_33740 | pvdP |                                                     |                                                                                                                                                                                                                                                                                                                |                                                                                                                                                                                              |
| PA14_33810 | pvdA |                                                     |                                                                                                                                                                                                                                                                                                                |                                                                                                                                                                                              |
| PA14_34330 |      |                                                     | Sulfur metabolism                                                                                                                                                                                                                                                                                              | pau00920                                                                                                                                                                                     |
| PA14_36570 | glgA | glycogen synthase                                   | Starch and sucrose metabolism;<br>Biosynthesis of secondary metabolites                                                                                                                                                                                                                                        | pau00500<br>pau01110                                                                                                                                                                         |
| PA14_36630 |      | putative glycosyl hydrolase                         | Starch and sucrose metabolism;<br>Biosynthesis of secondary metabolites                                                                                                                                                                                                                                        | pau00500<br>pau01110                                                                                                                                                                         |
| PA14_36710 | glgB | glycogen branching enzyme                           | Starch and sucrose metabolism;<br>Biosynthesis of secondary metabolites                                                                                                                                                                                                                                        | pau00500<br>pau01110                                                                                                                                                                         |
| PA14_36740 |      | hypothetical protein                                | Starch and sucrose metabolism                                                                                                                                                                                                                                                                                  | pau00500                                                                                                                                                                                     |
| PA14_38590 | bdhA |                                                     | Synthesis and degradation of ketone bodies;<br>Butanoate metabolism                                                                                                                                                                                                                                            | pau00072<br>pau00650                                                                                                                                                                         |
| PA14_39640 | cobN | cobaltochelataase subunit CobN                      | Porphyrin and chlorophyll metabolism                                                                                                                                                                                                                                                                           | pau00860                                                                                                                                                                                     |
| PA14_41670 | ppsA |                                                     | Pyruvate, Methane metabolism                                                                                                                                                                                                                                                                                   | pau00620<br>pau00680                                                                                                                                                                         |
| PA14_41950 |      |                                                     | Fatty acid, Valine, leucine and isoleucine,<br>Geraniol, Lysine, Benzoate,<br>Aminobenzoate, Limonene and pinene,<br>Caprolactam degradation; Phenylalanine,<br>Tryptophan, beta-Alanine, Propanoate,<br>Butanoate metabolism; Biosynthesis of<br>secondary metabolites, antibiotics; Fatty<br>acid metabolism | pau00071<br>pau00280<br>pau00281<br>pau00310<br>pau00362<br>pau00627<br>pau00903<br>pau00930<br>pau00360<br>pau00380<br>pau00410<br>pau00640<br>pau00650<br>pau01110<br>pau01130<br>pau01212 |
| PA14_42850 | folE | GTP cyclohydrolase I                                | Folate biosynthesis                                                                                                                                                                                                                                                                                            | pau00790                                                                                                                                                                                     |
| PA14_43790 |      | putative aldehyde dehydrogenase                     |                                                                                                                                                                                                                                                                                                                |                                                                                                                                                                                              |
| PA14_44390 |      | putative cytochrome c oxidase<br>subunit            | Oxidative phosphorylation                                                                                                                                                                                                                                                                                      | pau00190                                                                                                                                                                                     |
| PA14_47550 |      |                                                     | Glutathione metabolism                                                                                                                                                                                                                                                                                         | pau00480                                                                                                                                                                                     |
| PA14_47550 |      |                                                     | Arachidonic acid metabolism                                                                                                                                                                                                                                                                                    | pau00590                                                                                                                                                                                     |

**Table S1** - cluster 2 (continued)

|            |      |                                                                                                    |                                                                                                                            |                                                                      |
|------------|------|----------------------------------------------------------------------------------------------------|----------------------------------------------------------------------------------------------------------------------------|----------------------------------------------------------------------|
| PA14_49710 |      |                                                                                                    | Pyruvate metabolism                                                                                                        | pau00620                                                             |
| PA14_50660 |      | hypothetical protein                                                                               | Cysteine and methionine, Sulfur metabolism; Biosynthesis of antibiotics, amino acids                                       | pau00270<br>pau00920<br>pau01130<br>pau01230                         |
| PA14_52690 | aruG | arginine/ornithine succinyltransferase AII subunit                                                 | Arginine and proline metabolism                                                                                            | pau00330                                                             |
| PA14_53480 | pta  | phosphate acetyltransferase                                                                        | Taurine and hypotaurine, Pyruvate, Propanoate, Methane metabolism                                                          | pau00430<br>pau00620<br>pau00640<br>pau00680                         |
| PA14_54000 | prpD |                                                                                                    | Propanoate metabolism                                                                                                      | pau00640                                                             |
| PA14_56240 | pykA |                                                                                                    | Glycolysis / Gluconeogenesis; Purine, Pyruvate metabolism; Biosynthesis of secondary metabolites, antibiotics, amino acids | pau00010<br>pau00230<br>pau00620<br>pau01110<br>pau01130<br>pau01230 |
| PA14_57370 | murD | UDP-N-acetylmuramoyl-L-alanyl-D-glutamate synthetase                                               | D-Glutamine and D-glutamate metabolism                                                                                     | pau00471                                                             |
| PA14_57370 | murD | UDP-N-acetylmuramoyl-L-alanyl-D-glutamate synthetase                                               | Peptidoglycan biosynthesis                                                                                                 | pau00550                                                             |
| PA14_57530 | sspA | stringent starvation protein A                                                                     |                                                                                                                            |                                                                      |
| PA14_57810 | murA | UDP-N-acetylglucosamine 1-carboxyvinyltransferase                                                  | Amino sugar and nucleotide sugar metabolism                                                                                | pau00520                                                             |
| PA14_57810 | murA | UDP-N-acetylglucosamine 1-carboxyvinyltransferase                                                  | Peptidoglycan biosynthesis                                                                                                 | pau00550                                                             |
| PA14_58030 | fumC | fumarate hydratase                                                                                 | TCA cycle; Pyruvate metabolism; Biosynthesis of secondary metabolites, antibiotics                                         | pau00020<br>pau00620<br>pau01110<br>pau01130                         |
| PA14_58190 | gatB | aspartyl/glutamyl-tRNA amidotransferase subunit B                                                  | Aminoacyl-tRNA biosynthesis                                                                                                | pau00970                                                             |
| PA14_60330 | ispH | 4-hydroxy-3-methylbut-2-enyl diphosphate reductase                                                 | Terpenoid backbone biosynthesis; Biosynthesis of secondary metabolites, antibiotics                                        | pau00900<br>pau01110<br>pau01130                                     |
| PA14_62200 | mrcB | penicillin-binding protein 1B                                                                      | Peptidoglycan biosynthesis                                                                                                 | pau00550                                                             |
| PA14_62850 | folP | dihydropteroate synthase                                                                           | Folate biosynthesis                                                                                                        | pau00790                                                             |
| PA14_63020 | fur  |                                                                                                    |                                                                                                                            |                                                                      |
| PA14_65480 | rhdA | thiosulfate sulfurtransferase                                                                      | Cysteine and methionine metabolism; Sulfur metabolism; Sulfur relay system                                                 | pau00270<br>pau00920<br>pau04122                                     |
| PA14_66440 | metY |                                                                                                    | Cysteine and methionine metabolism                                                                                         | pau00270                                                             |
| PA14_67240 | hutG | N-formylglutamate amidohydrolase                                                                   | Histidine metabolism                                                                                                       | pau00340                                                             |
| PA14_67260 |      | putative histidine/phenylalanine ammonia-lyase                                                     | Histidine metabolism                                                                                                       | pau00340                                                             |
| PA14_67350 | hutU |                                                                                                    | Histidine metabolism                                                                                                       | pau00340                                                             |
| PA14_67890 | hisA | 1-(5-phosphoribosyl)-5-[(5-phosphoribosylamino)methylideneamino] imidazole-4-carboxamide isomerase | Histidine metabolism; Biosynthesis of secondary metabolites, amino acids                                                   | pau00340<br>pau01110<br>pau01230                                     |
| PA14_68190 | rmlD | dTDP-4-dehydrorhamnose reductase                                                                   | Streptomycin, Polyketide sugar unit biosynthesis; Biosynthesis of secondary metabolites                                    | pau00521<br>pau00523<br>pau01110                                     |

**Table S1** - cluster 2 (continued)

|                                  |      |                                             |                                                                                                                                                                                                                                                                                                                                                          |                                                                                                                                                                                  |
|----------------------------------|------|---------------------------------------------|----------------------------------------------------------------------------------------------------------------------------------------------------------------------------------------------------------------------------------------------------------------------------------------------------------------------------------------------------------|----------------------------------------------------------------------------------------------------------------------------------------------------------------------------------|
| PA14_68340                       | arcB | ornithine carbamoyltransferase              | Arginine and proline metabolism; Biosynthesis of secondary metabolites, antibiotics, amino acids                                                                                                                                                                                                                                                         | pau00330<br>pau01110<br>pau01130<br>pau01230                                                                                                                                     |
| PA14_68350                       | arcC | carbamate kinase                            | Purine, Arginine and proline, Nitrogen metabolism                                                                                                                                                                                                                                                                                                        | pau00230<br>pau00330<br>pau00910                                                                                                                                                 |
| PA14_70160                       |      | omega amino acid--pyruvate transaminase     | Valine, leucine and isoleucine degradation; beta-Alanine, Propanoate metabolism                                                                                                                                                                                                                                                                          | pau00280<br>pau00410<br>pau00640                                                                                                                                                 |
| PA14_71260                       |      | putative FMN oxidoreductase                 |                                                                                                                                                                                                                                                                                                                                                          |                                                                                                                                                                                  |
| PA14_71630                       | adhA |                                             | Glycolysis / Gluconeogenesis; Fatty acid degradation; Tyrosine metabolism; Chloroalkane and chloroalkene, Naphthalene degradation; Biosynthesis of secondary metabolites, antibiotics; Degradation of aromatic compounds                                                                                                                                 | pau00010<br>pau00071<br>pau00350<br>pau00625<br>pau00626<br>pau01110<br>pau01220                                                                                                 |
| PA14_63250                       |      |                                             | Fatty acid degradation; Synthesis and degradation of ketone bodies; Valine, leucine and isoleucine, Lysine, Benzoate degradation; Tryptophan, Pyruvate, Glyoxylate and dicarboxylate, Propanoate, Butanoate metabolism; Terpenoid backbone biosynthesis; Biosynthesis of secondary metabolites, antibiotics; Fatty acid metabolism; Two-component system | pau00071<br>pau00072<br>pau00280<br>pau00310<br>pau00362<br>pau00380<br>pau00620<br>pau00630<br>pau00640<br>pau00650<br>pau00900<br>pau01110<br>pau01130<br>pau01212<br>pau02020 |
| PA14_03700                       | sbp  |                                             | Sulfur metabolism ABC transporters                                                                                                                                                                                                                                                                                                                       | pau00920<br>pau02010                                                                                                                                                             |
| PA14_12920                       |      | taurine ABC transporter periplasmic protein | Sulfur metabolism                                                                                                                                                                                                                                                                                                                                        | pau00920<br>pau02010                                                                                                                                                             |
| <b>Motility</b>                  |      |                                             |                                                                                                                                                                                                                                                                                                                                                          |                                                                                                                                                                                  |
| PA14_45800                       | fliM | flagellar motor switch protein FliM         | Flagellar assembly                                                                                                                                                                                                                                                                                                                                       | pau02040                                                                                                                                                                         |
| PA14_66640                       | pilO | type 4 fimbrial biogenesis protein PilO     |                                                                                                                                                                                                                                                                                                                                                          |                                                                                                                                                                                  |
| PA14_66650                       | pilN | type 4 fimbrial biogenesis protein PilN     |                                                                                                                                                                                                                                                                                                                                                          |                                                                                                                                                                                  |
| <b>Recombination/Replication</b> |      |                                             |                                                                                                                                                                                                                                                                                                                                                          |                                                                                                                                                                                  |
| PA14_70390                       | crc  |                                             | Base excision repair                                                                                                                                                                                                                                                                                                                                     | pau03410                                                                                                                                                                         |
| PA14_66720                       | priA |                                             | Homologous recombination                                                                                                                                                                                                                                                                                                                                 | pau03440                                                                                                                                                                         |
| <b>Signaling</b>                 |      |                                             |                                                                                                                                                                                                                                                                                                                                                          |                                                                                                                                                                                  |
| PA14_02270                       |      |                                             | Two-component system; Bacterial chemotaxis                                                                                                                                                                                                                                                                                                               | pau02020<br>pau02030                                                                                                                                                             |
| PA14_05390                       | chpA | ChpA                                        | Two-component system                                                                                                                                                                                                                                                                                                                                     | pau02020                                                                                                                                                                         |
| PA14_08370                       | vfr  |                                             | Two-component system                                                                                                                                                                                                                                                                                                                                     | pau02020                                                                                                                                                                         |
| PA14_30820                       |      |                                             | Two-component system Bacterial chemotaxis                                                                                                                                                                                                                                                                                                                | pau02020<br>pau02030                                                                                                                                                             |
| PA14_45800                       | fliM | flagellar motor switch protein FliM         | Bacterial chemotaxis                                                                                                                                                                                                                                                                                                                                     | pau02030                                                                                                                                                                         |

**Table S1** - cluster 2 (continued)

|                                  |      |                                                       |                                                                                                                                                                                                                                                                                                                                                          |                                                                                                                                                                                  |
|----------------------------------|------|-------------------------------------------------------|----------------------------------------------------------------------------------------------------------------------------------------------------------------------------------------------------------------------------------------------------------------------------------------------------------------------------------------------------------|----------------------------------------------------------------------------------------------------------------------------------------------------------------------------------|
| PA14_48030                       |      |                                                       | Two-component system                                                                                                                                                                                                                                                                                                                                     | pau02020                                                                                                                                                                         |
| PA14_48030                       |      |                                                       | Bacterial chemotaxis                                                                                                                                                                                                                                                                                                                                     | pau02030                                                                                                                                                                         |
| PA14_49180                       | phoP | two-component response regulator PhoP                 | Two-component system                                                                                                                                                                                                                                                                                                                                     | pau02020                                                                                                                                                                         |
| PA14_49440                       |      |                                                       | Two-component system                                                                                                                                                                                                                                                                                                                                     | pau02020                                                                                                                                                                         |
| PA14_51380                       | pqsE | quinolone signal response protein                     |                                                                                                                                                                                                                                                                                                                                                          |                                                                                                                                                                                  |
| PA14_52350                       |      | hypothetical protein                                  | Two-component system                                                                                                                                                                                                                                                                                                                                     | pau02020                                                                                                                                                                         |
| PA14_63250                       |      |                                                       | Fatty acid degradation; Synthesis and degradation of ketone bodies; Valine, leucine and isoleucine, Lysine, Benzoate degradation; Tryptophan, Pyruvate, Glyoxylate and dicarboxylate, Propanoate, Butanoate metabolism; Terpenoid backbone biosynthesis; Biosynthesis of secondary metabolites, antibiotics; Fatty acid metabolism; Two-component system | pau00071<br>pau00072<br>pau00280<br>pau00310<br>pau00362<br>pau00380<br>pau00620<br>pau00630<br>pau00640<br>pau00650<br>pau00900<br>pau01110<br>pau01130<br>pau01212<br>pau02020 |
| PA14_68230                       |      | two-component sensor                                  | Two-component system                                                                                                                                                                                                                                                                                                                                     | pau02020                                                                                                                                                                         |
| PA14_69470                       | algR | alginate biosynthesis regulatory protein AlgR         | Two-component system                                                                                                                                                                                                                                                                                                                                     | pau02020                                                                                                                                                                         |
| PA14_72380                       | algB | two-component response regulator AlgB                 | Two-component system                                                                                                                                                                                                                                                                                                                                     | pau02020                                                                                                                                                                         |
| <b>Transcription/Translation</b> |      |                                                       |                                                                                                                                                                                                                                                                                                                                                          |                                                                                                                                                                                  |
| PA14_61780                       |      |                                                       | Ribosome                                                                                                                                                                                                                                                                                                                                                 | pau03010                                                                                                                                                                         |
| <b>Transport</b>                 |      |                                                       |                                                                                                                                                                                                                                                                                                                                                          |                                                                                                                                                                                  |
| PA14_03700                       | sbp  |                                                       | Sulfur metabolism ABC transporters                                                                                                                                                                                                                                                                                                                       | pau00920<br>pau02010                                                                                                                                                             |
| PA14_03920                       | spuD |                                                       | ABC transporters                                                                                                                                                                                                                                                                                                                                         | pau02010                                                                                                                                                                         |
| PA14_04090                       |      | putative binding protein component of ABC transporter | ABC transporters                                                                                                                                                                                                                                                                                                                                         | pau02010                                                                                                                                                                         |
| PA14_07860                       |      | putative ATP-binding component of ABC transporter     |                                                                                                                                                                                                                                                                                                                                                          |                                                                                                                                                                                  |
| PA14_09300                       |      | putative ATP-binding component of ABC transporter     |                                                                                                                                                                                                                                                                                                                                                          |                                                                                                                                                                                  |
| PA14_09320                       |      | putative ATP-binding component of ABC transporter     |                                                                                                                                                                                                                                                                                                                                                          |                                                                                                                                                                                  |
| PA14_09340                       | fptA | Fe(III)-pyochelin outer membrane receptor precursor   |                                                                                                                                                                                                                                                                                                                                                          |                                                                                                                                                                                  |
| PA14_12920                       |      | taurine ABC transporter periplasmic protein           | Sulfur metabolism                                                                                                                                                                                                                                                                                                                                        | pau00920<br>pau02010                                                                                                                                                             |
| PA14_13010                       |      |                                                       | ABC transporters                                                                                                                                                                                                                                                                                                                                         | pau02010                                                                                                                                                                         |
| PA14_13600                       |      | putative binding protein component of ABC transporter | ABC transporters                                                                                                                                                                                                                                                                                                                                         | pau02010                                                                                                                                                                         |
| PA14_20580                       | amiC | aliphatic amidase expression-regulating protein       | ABC transporters                                                                                                                                                                                                                                                                                                                                         | pau02010                                                                                                                                                                         |
| PA14_22440                       |      | putative ATP-binding/permease fusion ABC transporter  |                                                                                                                                                                                                                                                                                                                                                          |                                                                                                                                                                                  |



**Table S1** - cluster 2 (continued)

|               |      |                                                                 |                                        |                      |
|---------------|------|-----------------------------------------------------------------|----------------------------------------|----------------------|
| PA14_22980    |      | putative binding protein component of ABC sugar transporter     | ABC transporters                       | pau02010             |
| PA14_25430    |      | hypothetical protein                                            | ABC transporters                       | pau02010             |
| PA14_27770    |      | ABC transporter ATP-binding protein                             |                                        |                      |
| PA14_33540    |      | putative permease of ABC transporter                            | ABC transporters                       | pau02010             |
| PA14_52790    | aotJ |                                                                 | ABC transporters                       | pau02010             |
| PA14_55040    |      | putative ATP-binding component of ferric enterobactin transport |                                        |                      |
| PA14_64900    |      |                                                                 | ABC transporters                       | pau02010             |
| PA14_68900    |      | putative binding protein component of ABC iron transporter      | ABC transporters                       | pau02010             |
| PA14_73410    |      | putative inner membrane protein translocase component YidC      | Protein export                         | pau03060             |
| PA14_58350    |      | putative binding protein component of ABC transpor              | ABC transporters; Bacterial chemotaxis | pau02010<br>pau02030 |
| <b>Others</b> |      |                                                                 |                                        |                      |
| CON_P50448    |      |                                                                 |                                        |                      |
| PA14_00480    |      |                                                                 |                                        |                      |
| PA14_00710    | osmC |                                                                 |                                        |                      |
| PA14_00790    | prlC | oligopeptidase A                                                |                                        |                      |
| PA14_01350    |      | hypothetical protein                                            |                                        |                      |
| PA14_01780    |      | putative nucleoside 2-deoxyribosyltransferase                   |                                        |                      |
| PA14_04100    |      |                                                                 |                                        |                      |
| PA14_04890    |      | putative zinc protease                                          |                                        |                      |
| PA14_05060    |      | hypothetical protein                                            |                                        |                      |
| PA14_05510    |      | hypothetical protein                                            |                                        |                      |
| PA14_05960    |      |                                                                 |                                        |                      |
| PA14_06000    |      |                                                                 |                                        |                      |
| PA14_06040    |      |                                                                 |                                        |                      |
| PA14_07020    |      | hypothetical protein                                            |                                        |                      |
| PA14_10820    |      |                                                                 |                                        |                      |
| PA14_11140    |      | putative nonribosomal peptide synthetase                        |                                        |                      |
| PA14_11320    |      |                                                                 |                                        |                      |
| PA14_12090    |      | RlpA family lipoprotein                                         |                                        |                      |
| PA14_12110    |      | hypothetical protein                                            |                                        |                      |
| PA14_12260    |      |                                                                 |                                        |                      |
| PA14_13000    |      |                                                                 |                                        |                      |

**Table S1** - cluster 2 (continued)

|            |           |                                        |  |  |
|------------|-----------|----------------------------------------|--|--|
| PA14_13140 |           | hypothetical protein                   |  |  |
| PA14_13150 |           |                                        |  |  |
| PA14_13170 |           |                                        |  |  |
| PA14_13260 | moaB<br>1 | MoaB1                                  |  |  |
| PA14_14290 |           |                                        |  |  |
| PA14_15200 |           |                                        |  |  |
| PA14_16250 | lasB      |                                        |  |  |
| PA14_16260 |           |                                        |  |  |
| PA14_16370 |           |                                        |  |  |
| PA14_16560 |           | putative lipoprotein                   |  |  |
| PA14_16620 |           | hypothetical protein                   |  |  |
| PA14_16640 |           |                                        |  |  |
| PA14_16750 |           | hypothetical protein                   |  |  |
| PA14_17050 | map       |                                        |  |  |
| PA14_17250 |           |                                        |  |  |
| PA14_17670 |           |                                        |  |  |
| PA14_17720 |           |                                        |  |  |
| PA14_18800 |           |                                        |  |  |
| PA14_19065 |           |                                        |  |  |
| PA14_19100 | rhlA      | rhamnosyltransferase chain A           |  |  |
| PA14_19360 |           | GNAT family acetyltransferase          |  |  |
| PA14_19410 |           |                                        |  |  |
| PA14_19490 |           |                                        |  |  |
| PA14_19590 |           | putative molybdopterin-binding protein |  |  |
| PA14_20290 |           |                                        |  |  |
| PA14_20520 |           | hypothetical protein                   |  |  |
| PA14_20770 |           | hypothetical protein                   |  |  |
| PA14_21120 |           |                                        |  |  |
| PA14_21960 |           | hypothetical protein                   |  |  |
| PA14_23110 |           |                                        |  |  |
| PA14_23200 |           | short chain dehydrogenase              |  |  |
| PA14_23470 | wbpM      |                                        |  |  |

**Table S1** - cluster 2 (continued)

|            |           |                                                    |  |  |
|------------|-----------|----------------------------------------------------|--|--|
| PA14_23680 | ibpA      |                                                    |  |  |
| PA14_23700 |           |                                                    |  |  |
| PA14_23730 |           |                                                    |  |  |
| PA14_24675 |           | hypothetical protein                               |  |  |
| PA14_24900 | moaB<br>2 | molybdopterin biosynthetic protein<br>B2           |  |  |
| PA14_24970 |           |                                                    |  |  |
| PA14_25420 |           | hypothetical protein                               |  |  |
| PA14_25500 |           | hypothetical protein                               |  |  |
| PA14_25600 |           | putative peptidase                                 |  |  |
| PA14_26190 |           |                                                    |  |  |
| PA14_27000 |           |                                                    |  |  |
| PA14_27070 |           |                                                    |  |  |
| PA14_27950 |           | hypothetical protein                               |  |  |
| PA14_28450 | eco       |                                                    |  |  |
| PA14_28490 |           |                                                    |  |  |
| PA14_29020 | cpo       |                                                    |  |  |
| PA14_29470 |           |                                                    |  |  |
| PA14_29710 |           | hypothetical protein                               |  |  |
| PA14_30210 | clpS      | ATP-dependent Clp protease<br>adaptor protein ClpS |  |  |
| PA14_30620 |           |                                                    |  |  |
| PA14_30840 |           |                                                    |  |  |
| PA14_31290 | pa1L      |                                                    |  |  |
| PA14_32890 |           | hypothetical protein                               |  |  |
| PA14_32950 |           |                                                    |  |  |
| PA14_33050 |           | hypothetical protein                               |  |  |
| PA14_33160 |           |                                                    |  |  |
| PA14_33280 | pvdL      | peptide synthase                                   |  |  |
| PA14_33290 |           |                                                    |  |  |
| PA14_33600 |           | hypothetical protein                               |  |  |
| PA14_33610 |           | peptide synthase                                   |  |  |
| PA14_33680 | fpvA      |                                                    |  |  |
| PA14_33730 |           | putative dipeptidase precursor                     |  |  |

**Table S1** - cluster 2 (continued)

|            |         |                                                   |  |  |
|------------|---------|---------------------------------------------------|--|--|
| PA14_33750 |         | putative outer membrane protein precursor         |  |  |
| PA14_33830 |         | hypothetical protein                              |  |  |
| PA14_34510 |         | hypothetical protein                              |  |  |
| PA14_36200 |         |                                                   |  |  |
| PA14_36530 |         |                                                   |  |  |
| PA14_37780 |         | hypothetical protein                              |  |  |
| PA14_38220 |         | hypothetical protein                              |  |  |
| PA14_38710 |         | hypothetical protein                              |  |  |
| PA14_39410 |         |                                                   |  |  |
| PA14_40250 |         | putative outer membrane protein precursor         |  |  |
| PA14_40880 |         | hypothetical protein                              |  |  |
| PA14_40960 |         | pilin biosynthetic protein                        |  |  |
| PA14_41640 |         |                                                   |  |  |
| PA14_42130 |         |                                                   |  |  |
| PA14_45840 |         | hypothetical protein                              |  |  |
| PA14_45930 |         | hypothetical protein                              |  |  |
| PA14_45950 | rsaL    |                                                   |  |  |
| PA14_46300 |         | hypothetical protein                              |  |  |
| PA14_47120 |         | hypothetical protein                              |  |  |
| PA14_47130 |         | hypothetical protein                              |  |  |
| PA14_47490 |         |                                                   |  |  |
| PA14_47930 |         | hypothetical protein                              |  |  |
| PA14_48810 |         | NAD-dependent deacetylase                         |  |  |
| PA14_49030 |         |                                                   |  |  |
| PA14_49510 | pyoS3 I | immunity protein S3I structural gene              |  |  |
| PA14_49520 | pyoS3 A | pyocin killing protein                            |  |  |
| PA14_49870 |         |                                                   |  |  |
| PA14_51170 | pauA    | pimeloyl-CoA synthetase                           |  |  |
| PA14_51830 |         |                                                   |  |  |
| PA14_53230 |         | oxidoreductase                                    |  |  |
| PA14_53500 |         |                                                   |  |  |
| PA14_54410 | mucB    | negative regulator for alginate biosynthesis MucB |  |  |

**Table S1** - cluster 2 (continued)

|            |      |                                                                   |  |  |
|------------|------|-------------------------------------------------------------------|--|--|
| PA14_55080 |      |                                                                   |  |  |
| PA14_55580 | nemO |                                                                   |  |  |
| PA14_55980 |      |                                                                   |  |  |
| PA14_56550 |      |                                                                   |  |  |
| PA14_56730 |      |                                                                   |  |  |
| PA14_58000 | sodM | superoxide dismutase                                              |  |  |
| PA14_58010 |      | hypothetical protein                                              |  |  |
| PA14_58330 |      |                                                                   |  |  |
| PA14_59845 |      |                                                                   |  |  |
| PA14_61060 |      |                                                                   |  |  |
| PA14_61080 |      |                                                                   |  |  |
| PA14_61720 |      | hypothetical protein                                              |  |  |
| PA14_62240 |      |                                                                   |  |  |
| PA14_62350 |      |                                                                   |  |  |
| PA14_62650 |      | hypothetical protein                                              |  |  |
| PA14_62690 |      | hypothetical protein                                              |  |  |
| PA14_63830 |      |                                                                   |  |  |
| PA14_64170 |      |                                                                   |  |  |
| PA14_64480 | osmE |                                                                   |  |  |
| PA14_65000 | azu  |                                                                   |  |  |
| PA14_65470 |      |                                                                   |  |  |
| PA14_66090 |      | hypothetical protein                                              |  |  |
| PA14_66200 |      | hypothetical protein                                              |  |  |
| PA14_66340 |      |                                                                   |  |  |
| PA14_68040 |      |                                                                   |  |  |
| PA14_68400 |      |                                                                   |  |  |
| PA14_69010 |      | hypothetical protein                                              |  |  |
| PA14_69050 |      |                                                                   |  |  |
| PA14_69260 |      | isoprenoid biosynthesis protein with amidotransferase-like domain |  |  |
| PA14_70490 |      |                                                                   |  |  |
| PA14_70740 |      |                                                                   |  |  |
| PA14_71450 |      |                                                                   |  |  |

**Table S2.** Mass-spectrometry signal intensities for denitrification enzymes detected in WT and  $\Delta phz$  samples taken over the course of colony development. Missing values indicate levels below detection limit.

|              |             | time (h) |        |        |        |        |        |         |
|--------------|-------------|----------|--------|--------|--------|--------|--------|---------|
|              |             | 24       | 30     | 33     | 36     | 39     | 42     | 54      |
| WT           | <i>napA</i> |          |        |        |        | 43838  |        | 59708   |
|              | <i>napD</i> | 30165    | 15583  |        |        | 17786  |        | 14066   |
|              | <i>napF</i> |          |        |        |        |        |        | 14693   |
|              | <i>nirF</i> |          | 17021  | 77596  |        | 27452  | 18684  |         |
|              | <i>nirM</i> |          | 27990  | 32545  | 23530  | 28399  | 52547  | 41801   |
|              | <i>nirS</i> |          | 247200 | 308800 | 307650 | 134230 | 278970 | 342820  |
|              | <i>norC</i> |          |        |        |        |        |        |         |
|              | <i>nosZ</i> |          |        |        |        |        |        | 34733   |
| $\Delta phz$ | <i>napA</i> |          |        |        |        | 41763  |        | 55884   |
|              | <i>napD</i> |          |        |        | 14914  |        | 11584  | 12022   |
|              | <i>napF</i> |          |        | 67381  |        | 9453.9 |        |         |
|              | <i>nirF</i> |          | 135650 | 26688  | 37463  | 32975  | 73904  | 69905   |
|              | <i>nirM</i> |          |        |        | 16481  |        | 61337  | 33303   |
|              | <i>nirS</i> | 367520   | 150880 | 659770 | 766800 | 954980 | 984730 | 1009300 |
|              | <i>norC</i> |          |        |        |        |        | 40956  |         |
|              | <i>nosZ</i> |          |        | 85967  |        | 139610 | 127000 | 173970  |

**Table S3.** Strains and plasmids used in this study.

| Strains/plasmids                                           | Number | Used in figures | Characteristics                                                                                                                                 | Source or reference |
|------------------------------------------------------------|--------|-----------------|-------------------------------------------------------------------------------------------------------------------------------------------------|---------------------|
| <i>Pseudomonas aeruginosa</i>                              |        |                 |                                                                                                                                                 |                     |
| PA14                                                       |        | 1               | Clinical isolate UCBPP-PA14                                                                                                                     | (1)                 |
| PA14 $\Delta phz$                                          | LD24   | 1               | PA14 with deletions of operons <i>phzA1-G1</i> and <i>phzA2-G2</i>                                                                              | This study          |
| BigBlue                                                    | LD64   | 1               | PA14 containing two copies of <i>phzM</i>                                                                                                       | (2)                 |
| PA14 $\Delta anr$                                          | LD915  |                 | PA14 with deletions of <i>anr</i>                                                                                                               | This study          |
| PA14 $\Delta phz \Delta anr$                               | LD916  |                 | PA14 with deletions of <i>phzA1-G1</i> , <i>phzA2-G2</i> and <i>anr</i>                                                                         | This study          |
| PA14 WT <i>attB::MCS-gfp</i>                               | LD876  | 3, 4            | PA14 with <i>MCS-gfp</i> inserted at the <i>attB</i> site using pLD844 (pSEK101)                                                                | This study          |
| PA14 $\Delta phz$ <i>attB::MCS-gfp</i>                     | LD880  | 3, 4            | PA14 $\Delta phz$ with <i>MCS-gfp</i> inserted at the <i>attB</i> site using pLD844 (pSEK101)                                                   | This study          |
| PA14 WT <i>attB::napEp-gfp</i>                             | LD877  | 3               | PA14 with <i>napEp-gfp</i> inserted at the <i>attB</i> site using pLD852 (pSEK101- <i>napEp</i> )                                               | This study          |
| PA14 $\Delta phz$ <i>attB::napEp-gfp</i>                   | LD881  | 3               | PA14 $\Delta phz$ with <i>napEp-gfp</i> inserted at the <i>attB</i> site using pLD852 (pSEK101- <i>napEp</i> )                                  | This study          |
| PA14 WT <i>attB::narK1p-gfp</i>                            | LD921  | 3, 4            | PA14 with <i>narK1p-gfp</i> inserted at the <i>attB</i> site using pLD902 (pSEK101- <i>narK1p</i> )                                             | This study          |
| PA14 $\Delta phz$ <i>attB::narK1p-gfp</i>                  | LD922  | 3, 4            | PA14 $\Delta phz$ with <i>narK1p-gfp</i> inserted at the <i>attB</i> site using pLD902 (pSEK101- <i>narK1p</i> )                                | This study          |
| PA14 WT <i>attB::nirSp-gfp</i>                             | LD927  | 3               | PA14 with <i>nirSp-gfp</i> inserted at the <i>attB</i> site using pLD903 (pSEK101- <i>nirSp</i> )                                               | This study          |
| PA14 $\Delta phz$ <i>attB::nirSp-gfp</i>                   | LD928  | 3               | PA14 $\Delta phz$ with <i>nirSp-gfp</i> inserted at the <i>attB</i> site using pLD903 (pSEK101- <i>nirSp</i> )                                  | This study          |
| PA14 WT <i>attB::norCp-gfp</i>                             | LD1149 | 3               | PA14 with <i>norCp-gfp</i> inserted at the <i>attB</i> site using pSEK101- <i>norCp</i>                                                         | This study          |
| PA14 $\Delta phz$ <i>attB::norCp-gfp</i>                   | LD1150 | 3               | PA14 $\Delta phz$ with <i>norCp-gfp</i> inserted at the <i>attB</i> site using pSEK101- <i>norCp</i>                                            | This study          |
| PA14 WT <i>attB::nosRp-gfp</i>                             | LD933  | 3               | PA14 with <i>nosRp-gfp</i> inserted at the <i>attB</i> site using pLD904 (pSEK101- <i>nosRp</i> )                                               | This study          |
| PA14 $\Delta phz$ <i>attB::nosRp-gfp</i>                   | LD934  | 3               | PA14 $\Delta phz$ with <i>nosRp-gfp</i> inserted at the <i>attB</i> site using pLD904 (pSEK101- <i>nosRp</i> )                                  | This study          |
| PA14 WT <i>attB::MCS-gfp</i>                               | LD2478 | 5, 6            | PA14 with <i>MCS-gfp</i> inserted at the <i>attB</i> site using pLD2477 (pMQ37)                                                                 | This study          |
| PA14 $\Delta phz$ <i>attB::MCS-gfp</i>                     | LD2479 | 5, 6            | PA14 $\Delta phz$ with <i>MCS-gfp</i> inserted at the <i>attB</i> site using pLD2477 (pMQ37)                                                    | This study          |
| PA14 WT <i>attB::napE<sub>200bp</sub>-gfp</i>              | LD2522 | 5, 6            | PA14 with <i>PnapE<sub>200bp</sub>-gfp</i> inserted at the <i>attB</i> site using pLD2521 (pMQ37- <i>napE<sub>200bp</sub></i> )                 | This study          |
| PA14 $\Delta phz$ <i>attB::napE<sub>200bp</sub>-gfp</i>    | LD2523 | 5, 6            | PA14 $\Delta phz$ with <i>PnapE<sub>200bp</sub>-gfp</i> inserted at the <i>attB</i> site using pLD2521 (pMQ37- <i>napE<sub>200bp</sub></i> )    | This study          |
| PA14 $\Delta phz$ HM <i>attB::napE<sub>200bp</sub>-gfp</i> | LD2706 | 5               | PA14 $\Delta phz$ HM with <i>PnapE<sub>200bp</sub>-gfp</i> inserted at the <i>attB</i> site using pLD2521 (pMQ37- <i>napE<sub>200bp</sub></i> ) | This study          |
| PA14 $\Delta phz$ HS <i>attB::napE<sub>200bp</sub>-gfp</i> | LD2707 | 5               | PA14 $\Delta phz$ HS with <i>PnapE<sub>200bp</sub>-gfp</i> inserted at the <i>attB</i> site using pLD2521 (pMQ37- <i>napE<sub>200bp</sub></i> ) | This study          |

**Table S3** (continued)

|                                                                         |        |         |                                                                                                                                                                                    |            |
|-------------------------------------------------------------------------|--------|---------|------------------------------------------------------------------------------------------------------------------------------------------------------------------------------------|------------|
| PA14 WT <i>attB::napEp<sub>100bp</sub>-gfp</i>                          | LD2528 | 6       | PA14 with <i>PnapE<sub>100bp</sub>-gfp</i> inserted at the <i>attB</i> site using pLD2527 (pMQ37- <i>napEp<sub>100bp</sub></i> )                                                   | This study |
| PA14 $\Delta$ <i>phz attB::napEp<sub>100bp</sub>-gfp</i>                | LD2529 | 6       | PA14 $\Delta$ <i>phz</i> with <i>PnapE<sub>100bp</sub>-gfp</i> inserted at the <i>attB</i> site using pLD2527 (pMQ37- <i>napEp<sub>100bp</sub></i> )                               | This study |
| PA14 WT <i>attB::napEp<sub>70bp</sub>-gfp</i>                           | LD2665 | 6       | PA14 with <i>PnapE<sub>70bp</sub>-gfp</i> inserted at the <i>attB</i> site using pLD2664 (pMQ37- <i>napEp<sub>70bp</sub></i> )                                                     | This study |
| PA14 $\Delta$ <i>phz attB::napEp<sub>70bp</sub>-gfp</i>                 | LD2666 | 6       | PA14 $\Delta$ <i>phz</i> with <i>PnapE<sub>70bp</sub>-gfp</i> inserted at the <i>attB</i> site using pLD2664 (pMQ37- <i>napEp<sub>70bp</sub></i> )                                 | This study |
| PA14 WT <i>attB::napEp<sub>70bp</sub>-shuffle-3-gfp</i>                 | LD2668 | 6       | PA14 with <i>PnapE<sub>70bp</sub>-shuffle-3-gfp</i> inserted at the <i>attB</i> site using pLD2667 (pMQ37- <i>napEp<sub>70bp</sub>-shuffle-3</i> )                                 | This study |
| PA14 $\Delta$ <i>phz attB::napEp<sub>70bp</sub>-shuffle-3-gfp</i>       | LD2669 | 6       | PA14 $\Delta$ <i>phz</i> with <i>PnapE<sub>70bp</sub>-shuffle-3-gfp</i> inserted at the <i>attB</i> site using pLD2667 (pMQ37- <i>napEp<sub>70bp</sub>-shuffle-3</i> )             | This study |
| PA14 WT <i>attB::napEp<sub>70bp</sub>-shuffle-1&amp;2-gfp</i>           | LD2762 | 6       | PA14 with <i>PnapE<sub>70bp</sub>-shuffle-1&amp;2-gfp</i> inserted at the <i>attB</i> site using pLD2761 (pMQ37- <i>napEp<sub>70bp</sub>-shuffle-1&amp;2</i> )                     | This study |
| PA14 $\Delta$ <i>phz attB::napEp<sub>70bp</sub>-shuffle-1&amp;2-gfp</i> | LD2763 | 6       | PA14 $\Delta$ <i>phz</i> with <i>PnapE<sub>70bp</sub>-shuffle-1&amp;2-gfp</i> inserted at the <i>attB</i> site using pLD2761 (pMQ37- <i>napEp<sub>70bp</sub>-shuffle-1&amp;2</i> ) | This study |
| PA14 WT <i>attB::napEp<sub>70bp</sub>-shuffle-1-gfp</i>                 | LD2856 | 6       | PA14 with <i>PnapE<sub>70bp</sub>-shuffle-1-gfp</i> inserted at the <i>attB</i> site using pLD2855 (pMQ37- <i>napEp<sub>70bp</sub>-shuffle-1</i> )                                 | This study |
| PA14 $\Delta$ <i>phz attB::napEp<sub>70bp</sub>-shuffle-1-gfp</i>       | LD2857 | 6       | PA14 $\Delta$ <i>phz</i> with <i>PnapE<sub>70bp</sub>-shuffle-1-gfp</i> inserted at the <i>attB</i> site using pLD2855 (pMQ37- <i>napEp<sub>70bp</sub>-shuffle-1</i> )             | This study |
| PA14 WT <i>attB::napEp<sub>70bp</sub>-shuffle-2-gfp</i>                 | LD2859 | 6       | PA14 with <i>PnapE<sub>70bp</sub>-shuffle-2-gfp</i> inserted at the <i>attB</i> site using pLD2858 (pMQ37- <i>napEp<sub>70bp</sub>-shuffle-2</i> )                                 | This study |
| PA14 $\Delta$ <i>phz attB::napEp<sub>70bp</sub>-shuffle-2-gfp</i>       | LD2860 | 6       | PA14 $\Delta$ <i>phz</i> with <i>PnapE<sub>70bp</sub>-shuffle-2-gfp</i> inserted at the <i>attB</i> site using pLD2858 (pMQ37- <i>napEp<sub>70bp</sub>-shuffle-2</i> )             | This study |
| PA14 WT <i>attB::mexGp-gfp</i>                                          | LD2525 | 5       | PA14 with <i>mexGp-gfp</i> inserted at the <i>attB</i> site using pLD2524 (pMQ37- <i>mexGp</i> )                                                                                   | This study |
| PA14 $\Delta$ <i>phz attB::mexGp-gfp</i>                                | LD2526 | 5       | PA14 $\Delta$ <i>phz</i> with <i>mexGp-gfp</i> inserted at the <i>attB</i> site using pLD2524 (pMQ37- <i>mexGp</i> )                                                               | This study |
| PA14 $\Delta$ <i>phzHM attB::mexGp-gfp</i>                              | -      | 5       | PA14 $\Delta$ <i>phzHM</i> with <i>mexGp-gfp</i> inserted at the <i>attB</i> site using pLD2524 (pMQ37- <i>mexGp</i> )                                                             | This study |
| PA14 $\Delta$ <i>phzHS attB::mexGp-gfp</i>                              | -      | 5       | PA14 $\Delta$ <i>phzHS</i> with <i>mexGp-gfp</i> inserted at the <i>attB</i> site using pLD2524 (pMQ37- <i>mexGp</i> )                                                             | This study |
| PA14 WT <i>attB::MCS-gfp</i>                                            | LD2820 | 4, 7, 8 | PA14 with <i>MCS-gfp</i> inserted at the <i>attB</i> site using pLD2722 (pSEK103)                                                                                                  | This study |
| PA14 $\Delta$ <i>phz attB::MCS-gfp</i>                                  | LD2821 | 4, 7, 8 | PA14 $\Delta$ <i>phz</i> with <i>MCS-gfp</i> inserted at the <i>attB</i> site using pLD2722 (pSEK103)                                                                              | This study |
| PA14 $\Delta$ <i>anr attB::MCS-gfp</i>                                  | LD2944 | 7       | PA14 $\Delta$ <i>anr</i> with <i>MCS-gfp</i> inserted at the <i>attB</i> site using pLD2722 (pSEK103)                                                                              | This study |
| PA14 $\Delta$ <i>phz <math>\Delta</math>anr attB::MCS-gfp</i>           | LD2945 | 7       | PA14 $\Delta$ <i>phz <math>\Delta</math>anr</i> with <i>MCS-gfp</i> inserted at the <i>attB</i> site using pLD2722 (pSEK103)                                                       | This study |
| PA14 $\Delta$ <i>dnr attB::MCS-gfp</i>                                  | LD2994 | 7       | PA14 $\Delta$ <i>dnr</i> with <i>MCS-gfp</i> inserted at the <i>attB</i> site using pLD2722 (pSEK103)                                                                              | This study |
| PA14 $\Delta$ <i>phz <math>\Delta</math>dnr attB::MCS-gfp</i>           | LD2995 | 7       | PA14 $\Delta$ <i>phz <math>\Delta</math>dnr</i> with <i>MCS-gfp</i> inserted at the <i>attB</i> site using pLD2722 (pSEK103)                                                       | This study |
| PA14 WT <i>attB::napEp-gfp</i>                                          | LD2818 | 4, 8    | PA14 with <i>napEp-gfp</i> inserted at the <i>attB</i> site using pLD2817 (pSEK103- <i>napEp</i> )                                                                                 | This study |
| PA14 $\Delta$ <i>phz attB::napEp-gfp</i>                                | LD2819 | 4, 8    | PA14 $\Delta$ <i>phz</i> with <i>napEp-gfp</i> inserted at the <i>attB</i> site using pLD2817 (pSEK103- <i>napEp</i> )                                                             | This study |



**Table S3** (continued)

|                                                              |        |      |                                                                                                                                                                                                                                                                                                                                 |            |
|--------------------------------------------------------------|--------|------|---------------------------------------------------------------------------------------------------------------------------------------------------------------------------------------------------------------------------------------------------------------------------------------------------------------------------------|------------|
| PA14 WT <i>attB::nirSp-gfp</i>                               | LD2932 | 4, 8 | PA14 with <i>nirSp-gfp</i> inserted at the <i>attB</i> site using pLD2929 (pSEK103- <i>nirSp</i> )                                                                                                                                                                                                                              | This study |
| PA14 $\Delta$ <i>phz attB::nirSp-gfp</i>                     | LD2933 | 4, 8 | PA14 $\Delta$ <i>phz</i> with <i>nirSp-gfp</i> inserted at the <i>attB</i> site using pLD2929 (pSEK103- <i>nirSp</i> )                                                                                                                                                                                                          | This study |
| PA14 $\Delta$ <i>anr attB::nirSp-gfp</i>                     | LD2948 | 7    | PA14 $\Delta$ <i>anr</i> with <i>nirSp-gfp</i> inserted at the <i>attB</i> site using pLD2929 (pSEK103- <i>nirSp</i> )                                                                                                                                                                                                          | This study |
| PA14 $\Delta$ <i>phz</i> $\Delta$ <i>anr attB::nirSp-gfp</i> | LD2949 | 7    | PA14 $\Delta$ <i>phz</i> $\Delta$ <i>anr</i> with <i>nirSp-gfp</i> inserted at the <i>attB</i> site using pLD2929 (pSEK103- <i>nirSp</i> )                                                                                                                                                                                      | This study |
| PA14 $\Delta$ <i>dnr attB::nirSp-gfp</i>                     | LD2996 | 7    | PA14 $\Delta$ <i>dnr</i> with <i>nirSp-gfp</i> inserted at the <i>attB</i> site using pLD2929 (pSEK103- <i>nirSp</i> )                                                                                                                                                                                                          | This study |
| PA14 $\Delta$ <i>phz</i> $\Delta$ <i>dnr attB::nirSp-gfp</i> | LD2997 | 7    | PA14 $\Delta$ <i>phz</i> $\Delta$ <i>dnr</i> with <i>nirSp-gfp</i> inserted at the <i>attB</i> site using pLD2929 (pSEK103- <i>nirSp</i> )                                                                                                                                                                                      | This study |
| PA14 WT <i>attB::nirSp<sub>shuffle-A</sub>-gfp</i>           | LD2977 | 7    | PA14 with <i>nirSp<sub>shuffle-A</sub>-gfp</i> inserted at the <i>attB</i> site using pLD2976 (pSEK103- <i>nirSp<sub>shuffle-A</sub></i> )                                                                                                                                                                                      | This study |
| PA14 $\Delta$ <i>phz attB::nirSp<sub>shuffle-A</sub>-gfp</i> | LD2978 | 7    | PA14 $\Delta$ <i>phz</i> with <i>nirSp<sub>shuffle-A</sub>-gfp</i> inserted at the <i>attB</i> site using pLD2976 (pSEK103- <i>nirSp<sub>shuffle-A</sub></i> )                                                                                                                                                                  | This study |
| PA14 WT <i>attB::nirSp<sub>shuffle-B</sub>-gfp</i>           | LD2980 | 7    | PA14 with <i>nirSp<sub>shuffle-B</sub>-gfp</i> inserted at the <i>attB</i> site using pLD2979 (pSEK103- <i>nirSp<sub>shuffle-B</sub></i> )                                                                                                                                                                                      | This study |
| PA14 $\Delta$ <i>phz attB::nirSp<sub>shuffle-B</sub>-gfp</i> | LD2981 | 7    | PA14 $\Delta$ <i>phz</i> with <i>nirSp<sub>shuffle-B</sub>-gfp</i> inserted at the <i>attB</i> site using pLD2979 (pSEK103- <i>nirSp<sub>shuffle-B</sub></i> )                                                                                                                                                                  | This study |
| <i>Escherichia coli</i>                                      |        |      |                                                                                                                                                                                                                                                                                                                                 |            |
| UQ950                                                        | LD44   |      | <i>E. coli</i> DH5 $\alpha$ $\lambda$ ( <i>pir</i> ) strain for cloning; F- $\Delta$ ( <i>argF-lac</i> ) 169 $\phi$ 80d <i>lacZ</i> 58( $\Delta$ M15) <i>glnV44</i> (AS) <i>rfbD1</i> <i>gyrA96</i> (NaI <sup>R</sup> ) <i>recA1</i> <i>endA1</i> <i>spoT</i> <i>thi-1</i> <i>hsdR17</i> <i>deoR</i> $\lambda$ pir <sup>+</sup> | D. Lies    |
| BW29427                                                      | LD661  |      | Donor strain for biparental conjugation; <i>thrB1004</i> <i>pro</i> <i>thi</i> <i>rpsL</i> <i>hsdS</i> <i>lacZ</i> $\Delta$ M15RP4-1360 $\Delta$ ( <i>araBAD</i> )567 $\Delta$ <i>dapA1341</i> ::[ <i>erm</i> <i>pir</i> (wt)]                                                                                                  | B. Wanner  |
| S17-1                                                        | LD2901 |      | Str <sup>R</sup> , Tp <sup>R</sup> , F- RP4-2-Tc::Mu <i>aphA</i> ::Tn7 <i>recA</i> $\lambda$ pir lysogen                                                                                                                                                                                                                        | (3)        |
| <i>Saccharomyces cerevisiae</i>                              |        |      |                                                                                                                                                                                                                                                                                                                                 |            |
| InvSc1                                                       | LD622  |      | <i>MATa/MATa</i> <i>leu2/leu2</i> <i>trp1-289/trp1-289</i> <i>ura3-52/ura3-52</i> <i>his3-<math>\Delta</math>1/his3-<math>\Delta</math>1</i>                                                                                                                                                                                    | Invitrogen |
| Plasmids                                                     |        |      |                                                                                                                                                                                                                                                                                                                                 |            |
| pLD905 (pMQ30- $\Delta$ <i>anr</i> )                         | LD905  |      | <i>Anr</i> flanking fragments introduced into pMQ30 by gap repair cloning in yeast strain InvSc1                                                                                                                                                                                                                                | This study |
| pLD868 (pMQ30- $\Delta$ <i>dnr</i> )                         | LD868  |      | <i>Dnr</i> flanking fragments introduced into pMQ30 by gap repair cloning in yeast strain InvSc1                                                                                                                                                                                                                                | This study |
| pYL122                                                       | LD742  |      | Amp <sup>R</sup> <i>rhlA-gfp</i> transcription fusion in mini-CTX- <i>lacZ</i>                                                                                                                                                                                                                                                  | (3)        |
| pUC18-mini-Tn7                                               |        |      | Amp <sup>R</sup> ColE1 replicon mini-Tn7 base vector                                                                                                                                                                                                                                                                            | (4)        |
| pLD844 (pSEK101)                                             | LD844  |      | <i>rhlA</i> promoter of pYL122 was removed (XhoI and EcoRI) and replaced with a multiple cloning site (MCS) from pUC18-mini-Tn7                                                                                                                                                                                                 | This study |
| pLD852 (pSEK101- <i>napEp</i> )                              | LD852  |      | 475 bp <i>napE</i> promoter sequence inserted at the MCS (SpeI and XhoI) of pLD844                                                                                                                                                                                                                                              | This study |
| pLD902 (pSEK101- <i>narK1p</i> )                             | LD902  |      | 837 bp <i>narK1</i> promoter sequence inserted at the MCS (SpeI and XhoI) of pLD844                                                                                                                                                                                                                                             | This study |
| pLD903 (pSEK101- <i>nirSp</i> )                              | LD903  |      | 758 bp <i>nirS</i> promoter sequence inserted at the MCS (SpeI and XhoI) of pLD844                                                                                                                                                                                                                                              | This study |

**Table S3** (continued)

|                                                                |        |  |                                                                                                                                                |            |
|----------------------------------------------------------------|--------|--|------------------------------------------------------------------------------------------------------------------------------------------------|------------|
| pSEK101- <i>norCp</i>                                          |        |  | 550 bp <i>norC</i> promoter sequence inserted at the MCS (SpeI and XhoI) of pLD844                                                             | This study |
| pLD904 (pSEK101- <i>nosRp</i> )                                | LD904  |  | 497 bp <i>nosR</i> promoter sequence inserted at the MCS (SpeI and XhoI) of pLD844                                                             | This study |
| pMQ30                                                          | LD621  |  | Yeast-based allelic-exchange vector; <i>sacB</i> <sup>+</sup> , CEN/ARSH, URA3 <sup>+</sup> , Gm <sup>R</sup>                                  | (5)        |
| pLD2477 (pMQ37)                                                | LD2477 |  | MCS- <i>gfp</i> flanked by upstream and downstream 1 kb genomic sequences at <i>attB</i> site was inserted in pMQ30 through gap repair cloning | This study |
| pLD2521 (pMQ37- <i>napEp</i> <sub>200bp</sub> )                | LD2521 |  | 204 bp of <i>napE</i> promoter sequence inserted at the MCS (SpeI and XhoI) of pLD2477                                                         | This study |
| pLD2527 (pMQ37- <i>napEp</i> <sub>100bp</sub> )                | LD2527 |  | 105 bp of <i>napE</i> promoter sequence inserted at the MCS (SpeI and XhoI) of pLD2477                                                         | This study |
| pLD2664 (pMQ37- <i>napEp</i> <sub>70bp</sub> )                 | LD2664 |  | 67 bp of <i>napE</i> promoter sequence inserted at the MCS (SpeI and XhoI) of pLD2477                                                          | This study |
| pLD2667 (pMQ37- <i>napEp</i> <sub>70bp-shuffle-3</sub> )       | LD2667 |  | 67 bp of shuffle-3 <i>napE</i> promoter sequence inserted at the MCS (SpeI and XhoI) of pLD2477                                                | This study |
| pLD2761 (pMQ37- <i>napEp</i> <sub>70bp-shuffle-1&amp;2</sub> ) | LD2761 |  | 67 bp of shuffle-1&2 <i>napE</i> promoter sequence inserted at the MCS (SpeI and XhoI) of pLD2477                                              | This study |
| pLD2855 (pMQ37- <i>napEp</i> <sub>70bp-shuffle-1</sub> )       | LD2855 |  | 67 bp of shuffle-1 <i>napE</i> promoter sequence inserted at the MCS (SpeI and XhoI) of pLD2477                                                | This study |
| pLD2858 (pMQ37- <i>napEp</i> <sub>70bp-shuffle-2</sub> )       | LD2858 |  | 67 bp of shuffle-2 <i>napE</i> promoter sequence inserted at the MCS (SpeI and XhoI) of pLD2477                                                | This study |
| pLD2524 (pMQ37- <i>mexGp</i> )                                 | LD2524 |  | 448 bp of <i>mexG</i> promoter sequence inserted at the MCS (SpeI and XhoI) of pLD2477                                                         | This study |
| pLD2722 (pSEK103)                                              | LD2722 |  | <i>aacCI</i> (gentamicin resistance cassette) from pMQ30 was inserted at the BspDI site of pLD844                                              | This study |
| pLD2817 (pSEK103- <i>napEp</i> )                               | LD2817 |  | 204 bp of <i>napE</i> promoter sequence inserted at the MCS (SpeI and XhoI) of pLD2722                                                         | This study |
| pLD2929 (pSEK103- <i>nirSp</i> )                               | LD2929 |  | 224 bp of <i>nirS</i> promoter sequence inserted at the MCS (SpeI and XhoI) of pLD2722                                                         | This study |
| pLD2976 (pSEK103- <i>nirSp</i> <sub>shuffle-A</sub> )          | LD2976 |  | 224 bp of shuffle-A <i>nirS</i> promoter sequence inserted at the MCS (SpeI and XhoI) of pLD2722                                               | This study |
| pLD2979 (pSEK103- <i>nirSp</i> <sub>shuffle-B</sub> )          | LD2979 |  | 224 bp of shuffle-B <i>nirS</i> promoter sequence inserted at the MCS (SpeI and XhoI) of pLD2722                                               | This study |
| pFLP2                                                          | LD743  |  | Site-specific excision vector with <i>cI857</i> -controlled FLP recombinase; <i>sacB</i> <sup>+</sup> , Amp <sup>R</sup>                       | (6)        |

- Rahme LG, Stevens EJ, Wolfort SF, Shao J, Tompkins RG, Ausubel FM. 1995. Common virulence factors for bacterial pathogenicity in plants and animals. *Science* 268:1899–1902.
- Price-Whelan A, Dietrich LEP, Newman DK. 2007. Pyocyanin alters redox homeostasis and carbon flux through central metabolic pathways in *Pseudomonas aeruginosa* PA14. *J Bacteriol* 189:6372–6381.
- Lequette Y, Greenberg EP. 2005. Timing and localization of rhamnolipid synthesis gene expression in *Pseudomonas aeruginosa* biofilms. *J Bacteriol* 187:37–44.
- Choi K-H, Gaynor JB, White KG, Lopez C, Bosio CM, Karkhoff-Schweizer RR, Schweizer HP. 2005. A Tn7-based broad-range bacterial cloning and expression system. *Nat Methods* 2:443–448.
- Shanks RMQ, Caiazza NC, Hinsa SM, Toutain CM, O'Toole GA. 2006. *Saccharomyces cerevisiae*-based molecular tool kit for manipulation of genes from gram-negative bacteria. *Appl Environ Microbiol* 72:5027–5036.
- Hoang TT, Karkhoff-Schweizer RR, Kutchma AJ, Schweizer HP. 1998. A broad-host-range F<sub>1</sub>p-FRT recombination system for site-specific excision of chromosomally-located DNA sequences: application for isolation of unmarked *Pseudomonas aeruginosa* mutants. *Gene* 212:77–86.

**Table S4.** Primers used in this study.

| Number | Name                 | Sequence                                                        | Characteristics                                                                        |
|--------|----------------------|-----------------------------------------------------------------|----------------------------------------------------------------------------------------|
| 335    | PnarK1 for SpeI      | taccactagtCTCGCCGCTGTAGGTGAC                                    | To make pLD902 (pSEK101-narK1p) by restriction-ligation                                |
| 336    | PnarK1 rev XhoI      | aagcctcgagCTAAACTCTCTGCACGGACAGC                                | To make pLD902 (pSEK101-narK1p) by restriction-ligation                                |
| 337    | PnirS for SpeI       | taccactagtCTCTCGCCGACCAGGATG                                    | To make pLD903 (pSEK101-nirSp) by restriction-ligation                                 |
| 338    | PnirS rev XhoI       | aagcctcgagTCTATCTCCTCAGGAGCCCTG                                 | To make pLD903 (pSEK101-nirSp) by restriction-ligation                                 |
| 339    | PnosR for SpeI       | taccactagtGTATCTCACCTGCGGCAAC                                   | To make pLD904 (pSEK101-nosRp) by restriction-ligation                                 |
| 340    | PnosR rev XhoI       | aagcctcgagGTTCCATCTACTACTGGCTACCG                               | To make pLD904 (pSEK101-nosRp) by restriction-ligation                                 |
| 297    | napEprom(transcr.)-1 | TACCactagtGCTGCTGGTGTCCGGAGAT                                   | To make pLD852 (pSEK101-napEp) by restriction-ligation                                 |
| 298    | napEprom(transcr.)-2 | AAGCctcgagTCTATGCAGGCGACTGTAGAAAG                               | To make pLD852 (pSEK101-napEp) by restriction-ligation                                 |
| 384    | PnorC for SpeI       | taccactagtACCCTCTACTGGTGCCTGAC                                  | To make pSEK101-norCp by restriction-ligation                                          |
| 385    | PnorC rev XhoI       | aagcctcgagCTCCTGGAATGGGTGGTG                                    | To make pSEK101-norCp by restriction-ligation                                          |
| 1962   | addGentR-1           | tgtctaactcatcgatCGAATTGACATAAGCCTGTTCG                          | To make pLD2722 (pSEK103) from pLD844 (pSEK101) by restriction-ligation                |
| 1963   | addGentR-2           | CTTGGTCTGACAATCGATGC                                            | To make pLD2722 (pSEK103) from pLD844 (pSEK101) by restriction-ligation                |
| 1081   | attB::gfp-yeast1     | ggaattgtgagcggataacaattcacacaggaacagctTGGGG<br>AGGGTTCGAATAGG   | To make pLD2477 (pMQ37) from pMQ30 by gap repair cloning in yeast strain InvSc1        |
| 1082   | attB::gfp-yeast2     | cttaagcttctagagctctcagtcgacggatcactagfTTTTTCAG<br>TACGCGGATATGG | To make pLD2477 (pMQ37) from pMQ30 by gap repair cloning in yeast strain InvSc1        |
| 1083   | attB::gfp-yeast3     | actagtggatccgtcactcgagagcttagaagcttAAGGAGG<br>AAAAACATATGAGTA   | To make pLD2477 (pMQ37) from pMQ30 by gap repair cloning in yeast strain InvSc1        |
| 1084   | attB::gfp-yeast4     | ggcttttcagtacgcgatgatgcCACCGACAAACAAC<br>AGATAA                 | To make pLD2477 (pMQ37) from pMQ30 by gap repair cloning in yeast strain InvSc1        |
| 1085   | attB::gfp-yeast5     | tatctgtgtttgtcgtggcatgcATATCCGCGTACTGAAA<br>AGCC                | To make pLD2477 (pMQ37) from pMQ30 by gap repair cloning in yeast strain InvSc1        |
| 1086   | attB::gfp-yeast6     | aggcaaattctgtttatcagaccgtctcgttctgatCGGTCAG<br>CAACTGGAACAC     | To make pLD2477 (pMQ37) from pMQ30 by gap repair cloning in yeast strain InvSc1        |
| 1190   | PmexG-F              | acgtacactagtACCGCAAGCGGTTATTAGC                                 | To make pLD2524 (pMQ37-mexGp) by restriction-ligation                                  |
| 1191   | PmexG-R              | acgtacctgaGGTCGTTCCCTTGTGCTGGTC                                 | To make pLD2524 (pMQ37-mexGp) by restriction-ligation                                  |
| 943    | PnapE-primerF2       | acgtacactagtGCGAGAGTCGTGTCGTTAC                                 | To make pLD2521 (pMQ37-napEp200bp) and pLD2817 (pSEK103-napEp) by restriction-ligation |

**Table S4** (continued)

|      |                    |                                                                                        |                                                                          |
|------|--------------------|----------------------------------------------------------------------------------------|--------------------------------------------------------------------------|
| 1332 | PnapE-primerF100bp | acgtacactagtCGAACGCTCTGTTCCAG                                                          | To make pLD2527 (pMQ37-napEp100bp) by restriction-ligation               |
| 1605 | PnapE-primerF70bp  | acgtacactagtCGAGGTTTTTGCCCGTACT                                                        | To make pLD2664 (pMQ37-napEp70bp) by restriction-ligation                |
| 944  | PnapE-primerR      | acgtacctegaGCCCCAGCCTCTATGCAG                                                          | To make pLD2521, pLD2527, pLD2664 and pLD2817 by restriction-ligation    |
| 1872 | shuffle-F          | taggct tccgatccgtgctgtgcaaacgacc<br>TCGAGAGCTCTAGAAGCTTAAGGA                           | To make pLD2667 (pMQ37-napEp70bp-shuffle-A) by restriction-ligation      |
| 1871 | shuffle-R          | tctcga ggtcgtttgcaccagaccagatccgaa<br>AGCCTAGACCCTACTTGCAGTACG                         | To make pLD2667 (pMQ37-napEp70bp-shuffle-A) by restriction-ligation      |
| 2117 | shuffle-B-F        | TTACTAGTAGTCGGTTTTGCCCCGTCGAATGAT<br>CGA GGTCTAGGCTTTCTACAGTCGC                        | To make pLD2761 (pMQ37-napEp70bp-shuffle-B) by restriction-ligation      |
| 2116 | shuffle-B-R        | CCTAGACCTCGATCATTTCGACGGGAAAAACC<br>GACT ACTAGTAAGCATATCCGCGTACTGA                     | To make pLD2761 (pMQ37-napEp70bp-shuffle-B) by restriction-ligation      |
| 2181 | PnapE-shuffle-C-F  | acgtacactagtAGTCGGTTTTGCCCCGACTGCAA<br>GTAG                                            | To make pLD2855 (pMQ37-napEp70bp-shuffle-C) by restriction-ligation      |
| 2182 | PnapE-shuffle-D-F  | acgtacactagtCGAGGTTTTGCCCCGTCGAATGAT<br>CGAGGCTTAGGCTTTCTACAGTCG                       | To make pLD2858 (pMQ37-napEp70bp-shuffle-D) by restriction-ligation      |
| 2237 | PnarK1-primerF     | acgtacgtactactagtAGAATCTGTCCCCTGGT                                                     | To make pLD2928 (pSEK103-narK1p) by restriction-ligation                 |
| 2238 | PnarK1-primerR     | acgtacgtactctcagGGCTAAACTCTCTGCACGG<br>A                                               | To make pLD2928 (pSEK103-narK1p) by restriction-ligation                 |
| 2239 | PnirS-primerF      | acgtacgtactactagtGTCCCGCATGTCCTACTCCT                                                  | To make pLD2929 (pSEK103-nirSp) by restriction-ligation                  |
| 2240 | PnirS-primerF      | acgtacgtactctcagGGTCTATCTCCTCAGGAGCC<br>C                                              | To make pLD2929 (pSEK103-nirSp) by restriction-ligation                  |
| 138  | anr del-1 yeast    | ggaattgtgagcggataacaattcacacagaaacagctGCCACT<br>TTGAACTGGCCTTC                         | To make pLD905 (pMQ30-Δanr) by gap repair cloning in yeast strain InvSc1 |
| 139  | anr del-2 yeast    | GGAGTCGAGGATGTGCACTTcaaTCCTTGCAAG<br>TGTGCTTG                                          | To make pLD905 (pMQ30-Δanr) by gap repair cloning in yeast strain InvSc1 |
| 140  | anr del-3 yeast    | CAAGCACACTGCAAGGATTGaaGTGCACATCC<br>TCGACTCC                                           | To make pLD905 (pMQ30-Δanr) by gap repair cloning in yeast strain InvSc1 |
| 141  | anr del-4 yeast    | ggaattgtgagcggataacaattcacacagaaacagctGCCACT<br>TTGAACTGGCCTTCGCCACTTTGAACTGGCC<br>TTC | To make pLD905 (pMQ30-Δanr) by gap repair cloning in yeast strain InvSc1 |
| 144  | dnr del-1 yeast    | ggaattgtgagcggataacaattcacacagaaacagcGATGCC<br>TGGCTCGACTTC                            | To make pLD868 (pMQ30-Δdnr) by gap repair cloning in yeast strain InvSc1 |
| 145  | dnr del-2 yeast    | GCTTTCTCCCCTCCAGCTaaaCCTTCTCGCGG<br>ATCAT                                              | To make pLD868 (pMQ30-Δdnr) by gap repair cloning in yeast strain InvSc1 |
| 146  | dnr del-3 yeast    | ATGATCCGCGAGAAGGTTTtagcTGGACGGGA<br>GAAAGC                                             | To make pLD868 (pMQ30-Δdnr) by gap repair cloning in yeast strain InvSc1 |
| 147  | dnr del-4 yeast    | ccaggaattctgtttatcagaccctctcgttctgatGTGCTG<br>CAGACGGTCAAC                             | To make pLD868 (pMQ30-Δdnr) by gap repair cloning in yeast strain InvSc1 |

**Table S4** (continued)

|      |                     |                               |                                                         |
|------|---------------------|-------------------------------|---------------------------------------------------------|
| 1087 | attB::gfp-inCheck1  | AGGGCCAATCGATAGAGTTT          | To verify the genotype of gfp reporter strains          |
| 1088 | attB::gfp-inCheck2  | TCTTCGTGATCTGAAGCCATT         | To verify the genotype of gfp reporter strains          |
| 1089 | attB::gfp-outCheck1 | TAGAAGAACAGGCGGACGAT          | To verify the genotype of gfp reporter strains          |
| 1090 | attB::gfp-outCheck2 | AGCATCATCGGTACCCAGTC          | To verify the genotype of gfp reporter strains          |
| 400  | pDawn-B-2           | acatAAGCTTaaggagctgactgggtgaa | To verify the genotype of gfp reporter strains          |
| 1805 | GFPseq-R            | GTTGTATTCCAACCTTGTGTCCAA      | To verify the genotype of gfp reporter strains          |
| 142  | anr check-1         | AACTCGCGGATCATCTTCAC          | To verify the genotype of $\Delta$ anr deletion strains |
| 143  | anr check-2         | CGAAGATCAGTACGCTGTCG          | To verify the genotype of $\Delta$ anr deletion strains |
| 148  | dnr check-1         | GCTACGGCATCGAGGACAC           | To verify the genotype of $\Delta$ dnr deletion strains |
| 149  | dnr check-2         | GCAGATGCACTCGAACCAG           | To verify the genotype of $\Delta$ dnr deletion strains |

**Table S5.** The *napEp* and *nirSp* sequences

| Name                           | Promoter sequence (5' to 3')                                                                                                                                                                                                                                 |
|--------------------------------|--------------------------------------------------------------------------------------------------------------------------------------------------------------------------------------------------------------------------------------------------------------|
| <i>napEp</i> -200bp            | GCGAGAGTCGTGTCGTTACGGCTTGCAGAGTACGGACAGGGTACTGAACCGCCCTGAACGCT<br>TGCTGAACCCGGGCTGAACGACTCGCGTTTGCCGGCGAACGCTCTGTTTCCAGGCTGCCGCGG<br>CCGGCTCGGCGAGGTTTTGCCCCGTACTGCAAGTAGGGTCTAGGCTTTCTACAGTCGCCTGCAT<br>AGAGGCTGGGCC                                        |
| <i>napEp</i> -100bp            | CGAACGCTCTGTTTCCAGGCTGCCGCGCCGGCTCGGCGAGGTTTTGCCCCGTACTGCAAGTA<br>GGTCTAGGCTTTCTACAGTCGCCTGCATAGAGGCTGGGCC                                                                                                                                                   |
| <i>napEp</i> -70bp             | CGAGGTTTTGCCCCGTACTGCAAGTAGGGTCTAGGCTTTCTACAGTCGCCTGCATAGAGGCTGG<br>GCC                                                                                                                                                                                      |
| <i>napEp</i> -70bp-shuffle-1   | <b>AGTCGG</b> TTTTGCCCCGTACTGCAAGTAGGGTCTAGGCTTTCTACAGTCGCCTGCATAGAGGCTGG<br>GCC                                                                                                                                                                             |
| <i>napEp</i> -70bp-shuffle-1&2 | <b>AGTCGG</b> TTTTGCCCCGT <b>CGAATGATCGA</b> GGTCTAGGCTTTCTACAGTCGCCTGCATAGAGGCTGG<br>GCC                                                                                                                                                                    |
| <i>napEp</i> -70bp-shuffle-2   | CGAGGTTTTGCCCCGT <b>CGAATGATCGA</b> GGTCTAGGCTTTCTACAGTCGCCTGCATAGAGGCTGG<br>GCC                                                                                                                                                                             |
| <i>napEp</i> -70bp-shuffle-3   | CGAGGTTTTGCCCCGTACTGCAAGTAGGGTCTAGGCTTTCT <b>GGATCCGTGGTCTGGTCAAACGC</b><br><b>A</b> CC                                                                                                                                                                      |
| <i>nirSp</i>                   | GTCCCGCATGTCCTACTCCTGCGCTAGGGATTAGGACCGCACGCTATTCACAGTTGGAAGGTGC<br>CACAAGCGCAAAGCAACGCAATC <b>TTGATTCCGGTCAA</b> GCAAGGGTAAAGACCCTGCTTTCTATG<br>ATCCTTTCGCGCCATGAATTCCTGGGAGTTCCCGACGCAGCCACCCCAAAACACTGCTAAGGG<br>AGCGCCTCGCAGGGCTCCTGAGGAGATAGACC         |
| <i>nirSp</i> -shuffle-A        | GTCCCGCATGTCCTACTCCTGCGCTAGGGATTAGGACCGCACGCTATTCACAGTTGGAAGGTGC<br>CACAAGCGCAAAGCAACGCAATC <b>GTTCTATCGGTCAA</b> GCAAGGGTAAAGACCCTGCTTTCTATG<br>ATCCTTTCGCGCCATGAATTCCTGGGAGTTCCCGACGCAGCCACCCCAAAACACTGCTAAGGG<br>AGCGCCTCGCAGGGCTCCTGAGGAGATAGACC         |
| <i>nirSp</i> -shuffle-B        | <b>GCTTGCCAGCACATCCTGACCAGCTGGGGGCCAGCTCGCCGCAACTTAATCTAGTCAAGACC</b><br><b>ACATAGAGGGCAAAGTGCATTTCTTGATTCCGGTCAA</b> GCAAGGGTAAAGACCCTGCTTTCTATG<br>ATCAGCCAGAGATAATTCAGTCCATCTACCAGGGCCTGGTCCGGCCAGCTCGCGCCGGGA<br><b>CCTCACTACCTGAGGAACGGAACCTCCACCAG</b> |

**Shaded** sequences indicate shuffled regions

Underlined sequences indicate -10 and -35 elements

**Red font** indicates the position of Anr/Dnr binding site
